# Supplementary material for: Expression of OsMATE1 and OsMATE2 alters development, stress responses and pathogen susceptibility in Arabidopsis
Source: PubMed Central journal article supplement — Sci Rep. 2014 Feb 4;4:3964. doi: 10.1038/srep03964 (PMC3912489; doi:10.1038/srep03964), 2014-02-04
Supplement: srep03964-s1.pdf [file srep03964-s1.pdf]

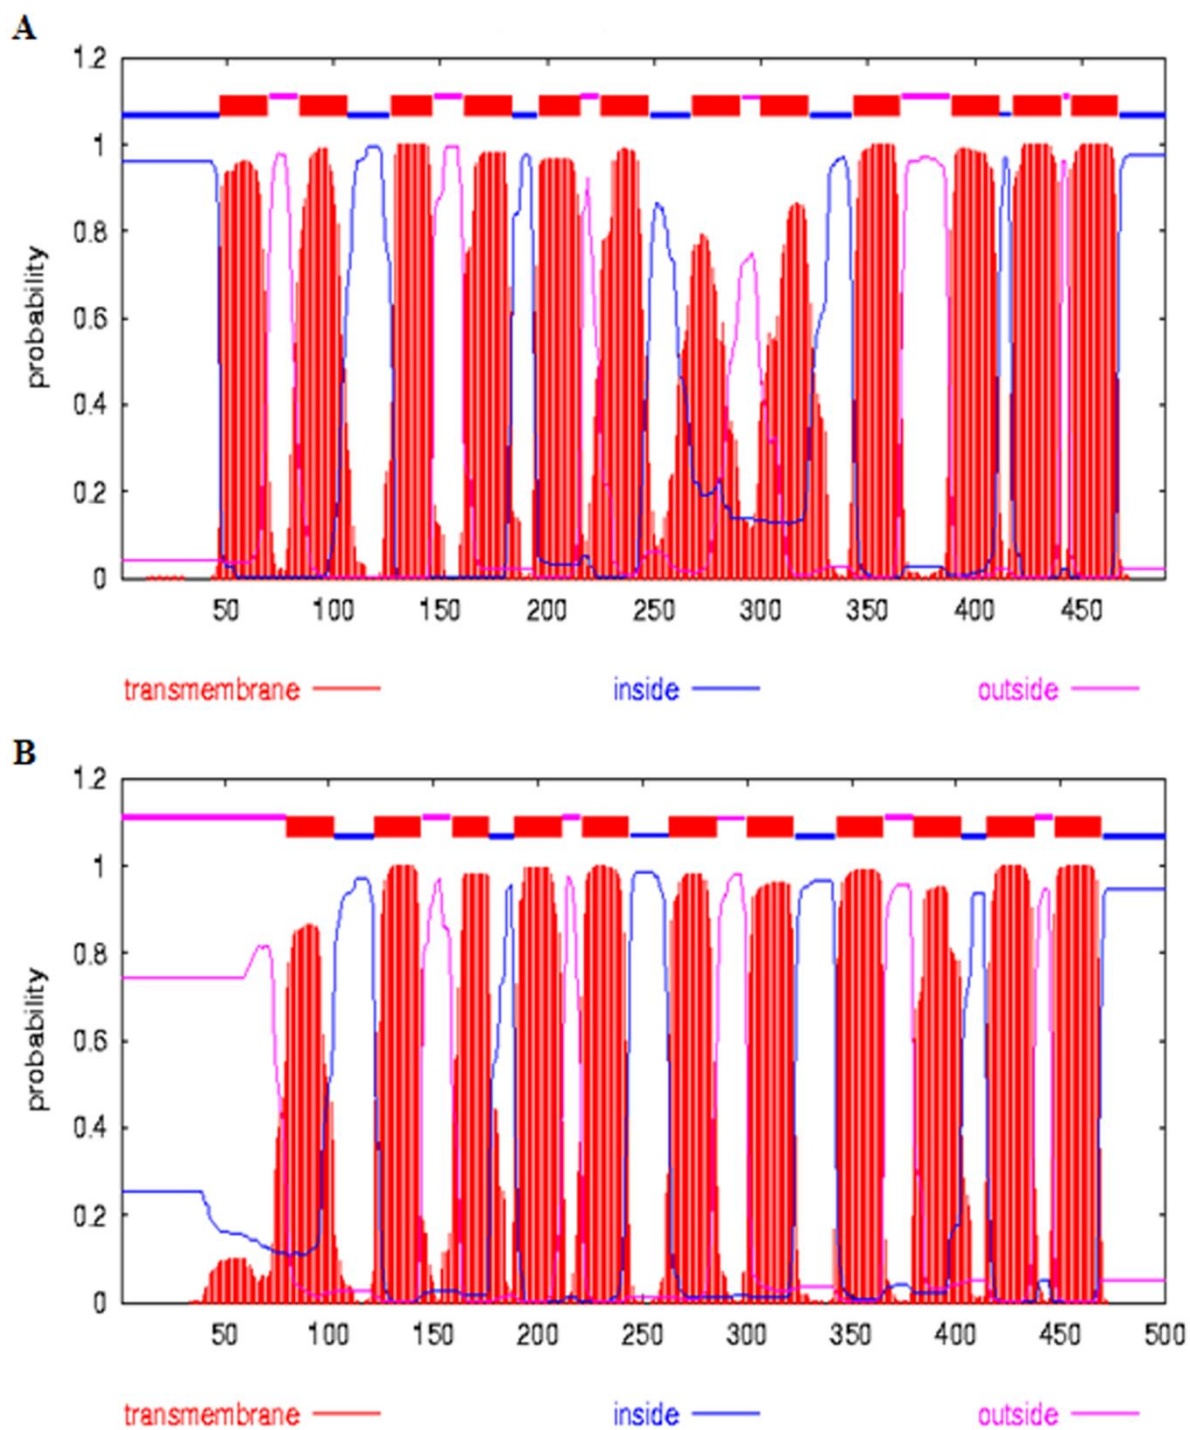

**Fig. S2 Transmembrane helix prediction.** Presence of transmembrane domain was calculated using TMHMM. Red colour represents the transmembrane helices. *In silico* prediction indicates the presence of 12 domains in OsMATE1 (A) and OsMATE2 (B).

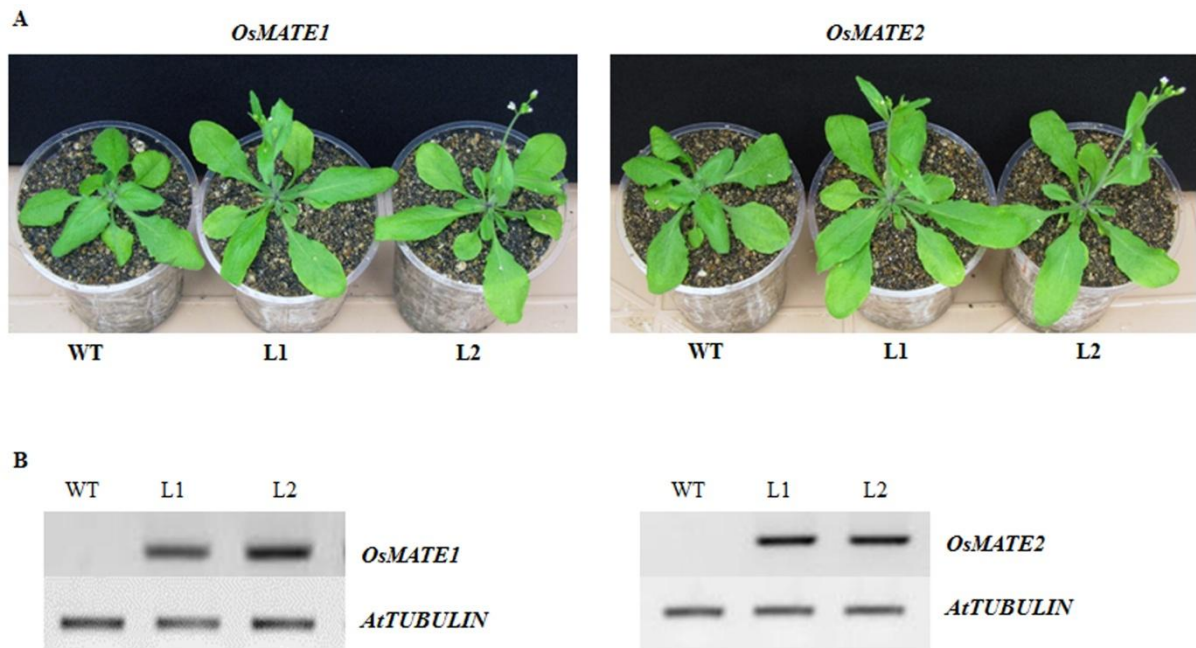

**Fig. S3 Confirmation of transgene expression.** (A) Photograph of two representative transgenic lines of *OsMATE1* and *OsMATE2*. (B) Transgene expression was confirmed through semiquantitative RT-PCR and *TUBULIN* was used as endogenous control.

**A**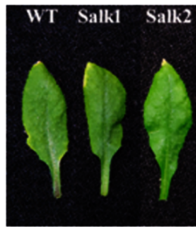**B**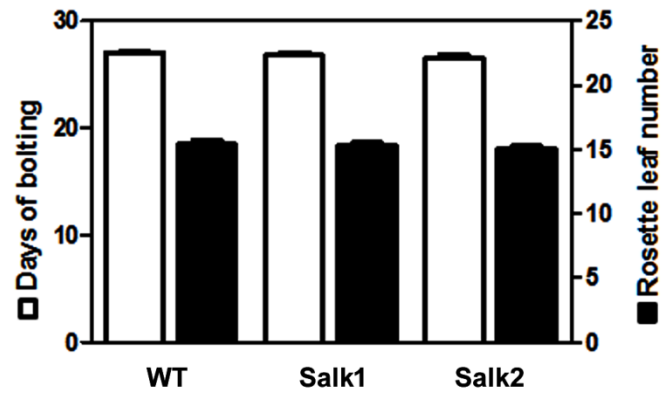

**Fig. S4 Flowering days of WT and salk mutants.** (A) Photograph of 8<sup>th</sup> leaf of salk mutant (three week old) along with WT are displayed. (B) Number of rosette leaf and days at bolting of WT and salk1 (SALK\_045655C) and salk2 (SALK\_124549C) grown under LD conditions (16h light-8h dark cycle). Bars are the mean and error bars are  $\pm$ SE (n=8-12).

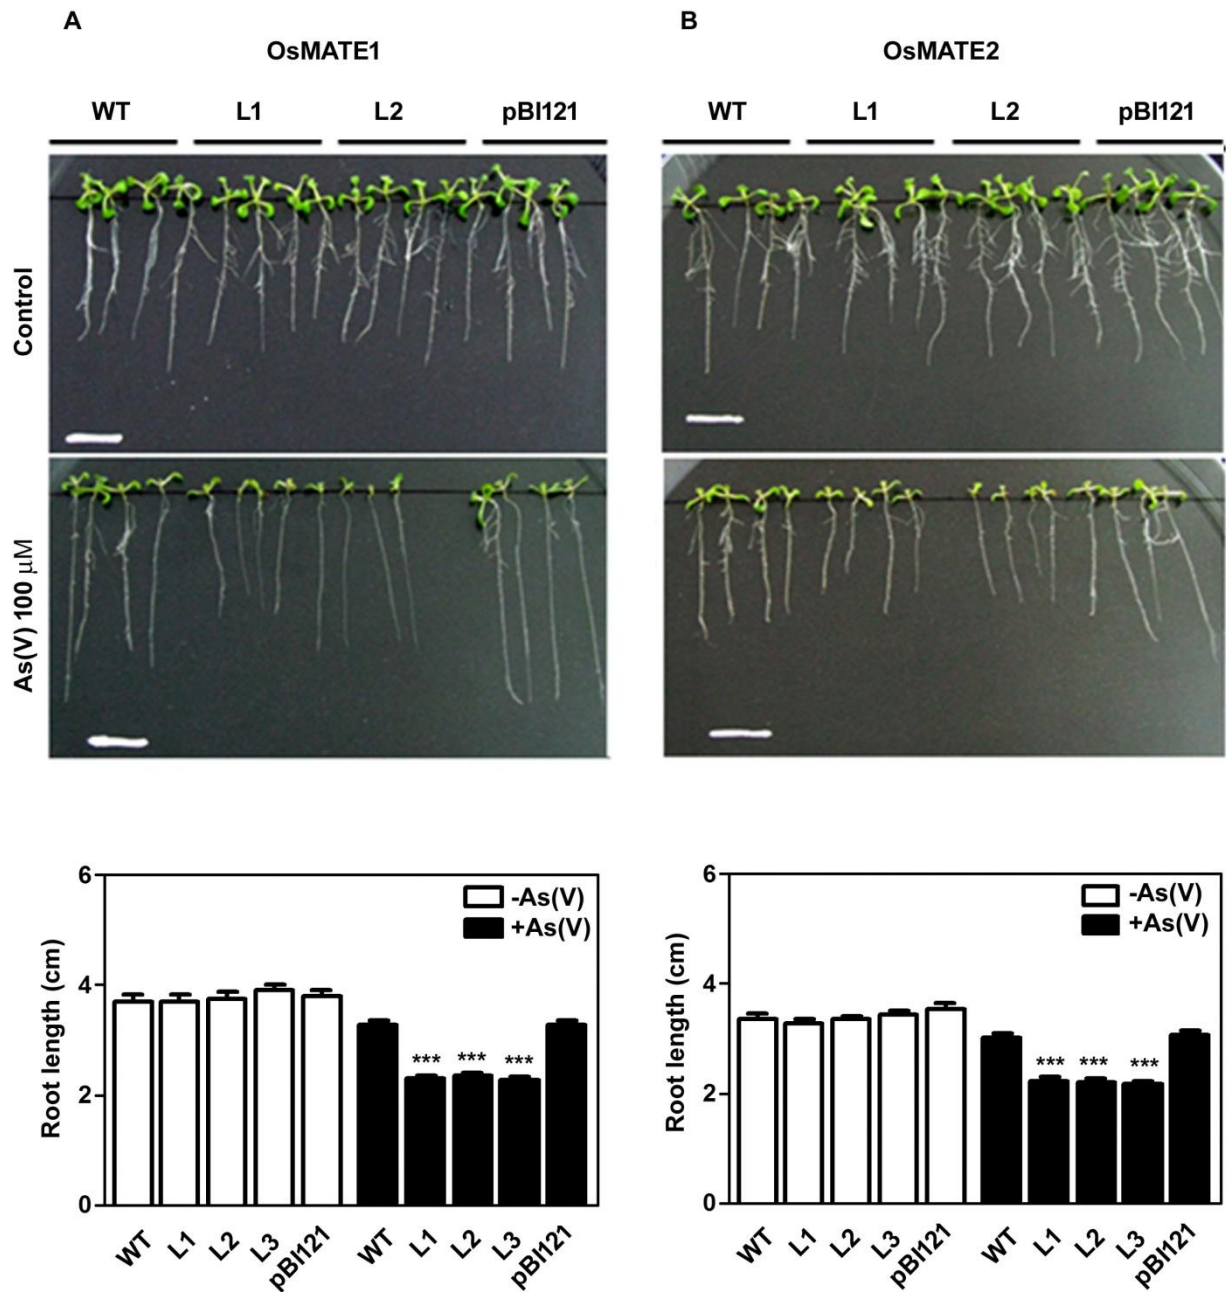

**Fig. S5 Expression of *OsMATEs* in *Arabidopsis* leads to sensitivity for As(V).** (A) Phenotypic changes of WT and two transgenic lines, expressing *OsMATE1* grown on control (half strength) and in the presence of As(V). (B) Sensitivity of transgenic lines, expressing *OsMATE2*, reflected towards AsV. Lower panel depicts the graphical representation of root length and while line depicts 1 cm scale bar. Bars are the mean of root length of 15-20 plants of each genotype and error bars represent  $\pm$ SE. Significance was determined by One-way ANOVA (Newman-Keuls used as post hoc test). \*\*\* Significantly different from WT ( $P < 0.0001$ ). Experiments are performed more than three times and result is the representative of one set.



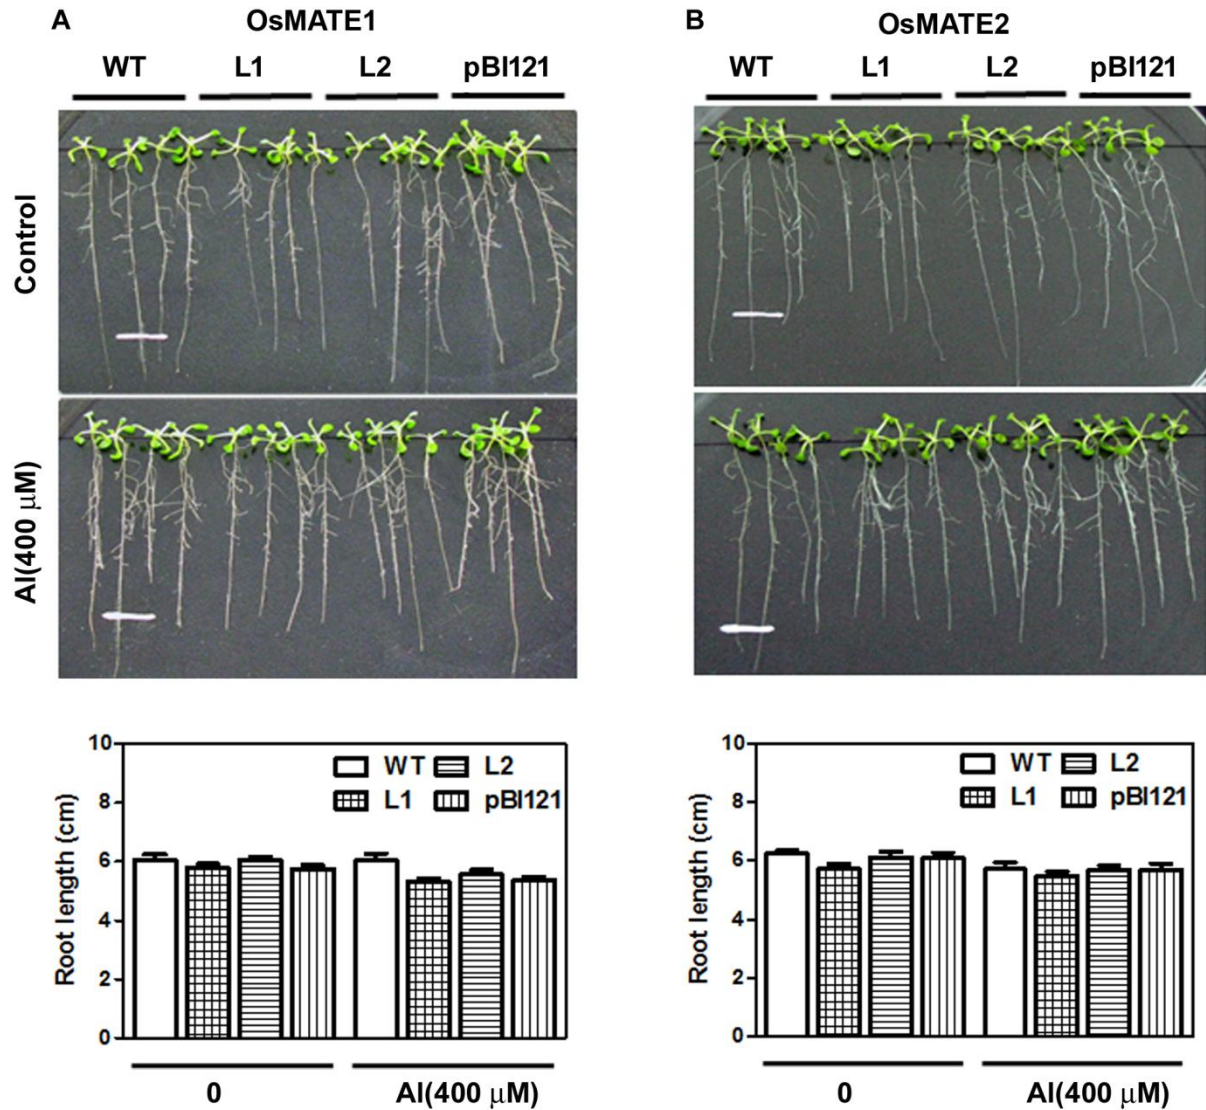

**Fig. S6 Effect of Aluminium on growth of transgenic *Arabidopsis* lines.** (A) Phenotypic changes of WT and transgenic lines, expressing *OsMATE1*, grown on control (half strength) and in the presence of Al. (B) Appearance of transgenic lines, expressing *OsMATE2*, during supplementation of Al (400  $\mu$ M). White scale bars are equivalent to 1 cm length. Lower panel depicts the graphical representation of root length. Bars are the mean of root length of 15-20 plants of each genotype and error bars represent  $\pm$ SE.

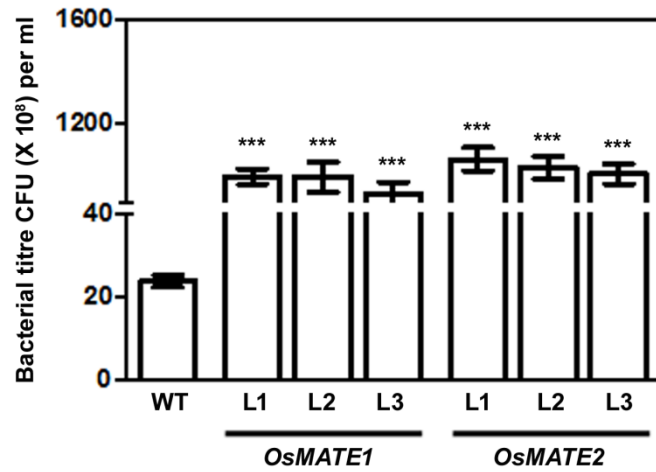

**Fig. S7 Bacterial growth after *in planta* sprayed inoculation.** Three week old plants were spray-inoculated with *Pst*DC3000 and bacterial growth was measured after 7 dpi. The experiment was performed two times with similar results. \*\*\* indicates significant differences ( $p < 0.0001$ ) in bacterial titre compared to WT (One-way ANOVA, Newman-Keuls used as post hoc test).

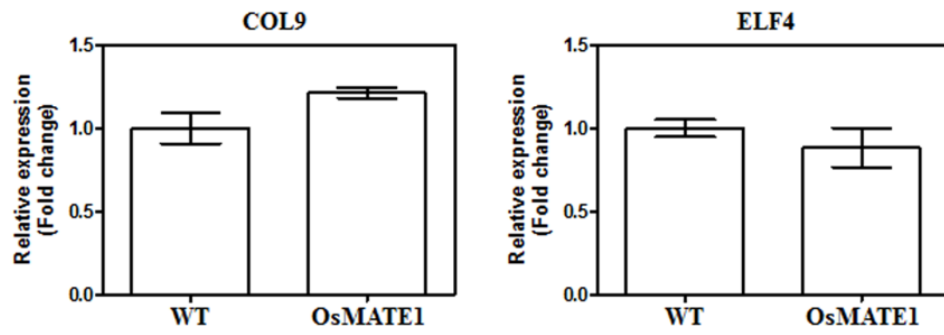

**Fig. S8 Relative expression of *COL9* and *ELF4*.** Transcript level of *COL9* and *ELF4* measured in WT and transgenic plants expressing *OsMATE1* by quantitative RT-PCR.



**Table S1** List of oligonucleotides and their use in the study

| S.No. | Primer Name | Primer sequence (5'-3')        | Use in the study                  |
|-------|-------------|--------------------------------|-----------------------------------|
| 1.    | MATE1F1     | CAGAGGAGGTTGGATTGTTTCGTTTC     | Gene specific primer for cloning  |
| 2.    | MATE1R1     | TCTGGTGACGAGCATATTAGCTC        | Gene specific primer for cloning  |
| 3.    | MATE1Xba1   | TCGGACGACACGGTCTAGAGGCGAT      | For cloning in pBI121 and 326sGFP |
| 4.    | MATE1Sac1   | ACCGAGCTCGGATCCCTTGTCCATG      | For cloning in pBI121             |
| 5.    | MATE1BamH1  | ACCGGACTTGGATCCCTTGTCCATG      | For cloning in 326sGFP            |
| 6.    | MATE1RTF    | GACAAGTTCGCGCTCATCTTCAC        | For semiquantitative RT-PCR       |
| 7.    | MATE1RTR    | ATGGCCAGAATTAGCGTCTGCAC        | For semiquantitative RT-PCR       |
| 8.    | MATE2F1     | CGGTCCGGTGGAGGCGACGACGACG      | Gene specific primer for cloning  |
| 9.    | MATE2R1     | TCAGTTCGCGTCAACGGATCAGGAT      | Gene specific primer for cloning  |
| 10    | MATE2Xba1   | CGGTCTCTAGAGGCGACGACGACGA      | For cloning in pBI121 and 326sGFP |
| 11    | MATE2Sac1   | TCAGTTCGCGTCAACGGATCAGGAT<br>G | For cloning in pBI121             |
| 12    | MATE2BamH1  | GAATCAGGATCCCGAATTCGTTGCA<br>T | For cloning in 326sGFP            |
| 13    | MATE2RTF    | TCATTGCATTCTTCAGCAACTGGC       | For semiquantitative RT-PCR       |
| 14    | MATE2RTR    | TCAGTTCGCGTCAACGGATCAGGAT<br>G | For semiquantitative RT-PCR       |
| 15    | AfTubulinF  | CTCACAGTCCCGGAGCTGACAC         | Endogenous control<br>Arabidopsis |
| 16    | AfTubulinR  | GCTTCAGTGAACCTCCATCTCGT        | Endogenous control<br>Arabidopsis |
| 17    | ProMATE1F   | GAATCAGGATCCCGAATTCGTTGCA<br>T | For cloning in pCAMBIA1303        |

|    |              |                                  |                                      |
|----|--------------|----------------------------------|--------------------------------------|
| 18 | ProMATE1R    | TCACCCATGGCCGCCGACCGTGTCTC<br>TC | For cloning in pCAMBIA1303           |
| 19 | ProMATE2F    | TGTGTTAAGCTTCGGTTGTTAACGT<br>G   | For cloning in pCAMBIA1303           |
| 20 | ProMATE2R    | TCCTCCATGGCCGCCGAGTGCGCG<br>CG   | For cloning in pCAMBIA1303           |
| 21 | At5g39610RTF | TCTGCTACTGCCATTGGTGA             | For Real Time expression<br>analysis |
| 22 | At5g39610RTR | TCTCCCATCTTAGCCTTCCA             | For Real Time expression<br>analysis |
| 23 | At3g20810RTF | CCACATCATAATACTTGCTCAGG<br>TT    | For Real Time expression<br>analysis |
| 24 | At3g20810RTR | TCTCAGATAAGGGTAAAGTTCGTC         | For Real Time expression<br>analysis |
| 25 | At1g07590RTF | GGGTGATGGGTTTCCAGTT              | For Real Time expression<br>analysis |
| 26 | At1g07590RTR | CCCTGATTATCCACTCCATCA            | For Real Time expression<br>analysis |
| 27 | At1g77450RTF | CAACAATTGGGCCTTAGCC              | For Real Time expression<br>analysis |
| 28 | At1g77450RTR | TGCTTCCTGAAAATAACAACACA          | For Real Time expression<br>analysis |
| 29 | At4g15490RTF | AGCAAGAGCAGATGGAGGAG             | For Real Time expression<br>analysis |
| 30 | At4g15490RTR | GCCGAACCACCATAAGAC               | For Real Time expression<br>analysis |
| 31 | AT2G29490RTF | AGACAATCGGATTCTTGACAT            | For Real Time expression<br>analysis |
| 32 | AT2G29490RTR | TCCAATACCTTTCCAAAGTCTAGC         | For Real Time expression<br>analysis |
| 33 | At2g14610RTF | GATGTGCCAAAGTGAGGTGTAA           | For Real Time expression<br>analysis |
| 34 | At2g14610RTR | TTCACATAATTCCCACGAGGA            | For Real Time expression<br>analysis |
| 35 | At3g57260RTF | GCTTAGCCTCACCACCAATG             | For Real Time expression<br>analysis |
| 36 | At3g57260RTR | CCCGTAGCATACTCCGATTT             | For Real Time expression<br>analysis |

|    |              |                                |                                   |
|----|--------------|--------------------------------|-----------------------------------|
| 37 | At1g75040RTF | CGGACTACTCGAGGATTTTCA          | For Real Time expression analysis |
| 38 | At1g75040RTR | GTGCTCGTTTCGTCGCATA            | For Real Time expression analysis |
| 39 | At3g25010RTF | CTAATGCACCACCAGCACAT           | For Real Time expression analysis |
| 40 | At3g25010RTR | GCCTTCCCAGTTCAACACTT           | For Real Time expression analysis |
| 41 | At4g23150RTF | GCCATTGGTACACCACCAC            | For Real Time expression analysis |
| 42 | At4g23150RTR | GCTACCACGACCACATTTGA           | For Real Time expression analysis |
| 43 | At2g43570RTF | CATCTCCAAACGCGAAATC            | For Real Time expression analysis |
| 44 | At2g43570RTR | GCTGGTCCATCAATTTCTC            | For Real Time expression analysis |
| 45 | At5g24530RTF | TGATCGATCTTTTCTCATCAA          | For Real Time expression analysis |
| 46 | At5g24530RTR | TTGTAACTCCGTGATTTATGACC        | For Real Time expression analysis |
| 47 | At3g27690RTF | GCGTCGTACCGTCAAGTCTAC          | For Real Time expression analysis |
| 48 | At3g27690RTR | GGAAAATGGTCCTAGGTATTTGG        | For Real Time expression analysis |
| 49 | At2g18660RTF | TCGATGCATTGGTGCTACAT           | For Real Time expression analysis |
| 50 | At2g18660RTR | TCCCGGCAGAAATCAACTAC           | For Real Time expression analysis |
| 51 | ELF4RTF      | TGAAGAGGAACGGCGAGA             | For Real Time expression analysis |
| 52 | ELF4RTR      | CGGTCAAGATTCTCCACAT            | For Real Time expression analysis |
| 53 | COL9RTF      | CTAAAGTTTCTGGATTCAACTTCTG<br>A | For Real Time expression analysis |
| 54 | COL9RTR      | TGTTACCCACAGAAGTCACACA         | For Real Time expression analysis |

---

**Table S2:** Polypeptide sequences of MATE proteins identified from rice and present in *Arabidopsis* and other plants

| S.No. | Locus ID   | Amino acid sequences                                                                                                                                                                                                                                                                                                                                                                                                                                                                                                                                   |
|-------|------------|--------------------------------------------------------------------------------------------------------------------------------------------------------------------------------------------------------------------------------------------------------------------------------------------------------------------------------------------------------------------------------------------------------------------------------------------------------------------------------------------------------------------------------------------------------|
| 1     | Os01g31980 | MGSSDSQAPLLLPRGSHRKEEEEEEEYAAAGKVRGCCGGDGEGGWRE<br>ATAEAGRLASLAAPMIAVALLQLMMQLISTVMVGHLEVALAGAAIAN<br>SLTNVSGFSVLMGLACGLETICGQAYGAEQYHKLALYMYRSIIVLLVVS<br>VPAAIWWFIPEVPLIGQQPEIASEVGKYALWLIPGLFAFTVAQCLSKFLQ<br>TQSLIFPMVLSSTLALFIPLCWFMVYKVGMGNAGAALSVSICDWVEVT<br>VLGLYIVLSPSCEKTRAPLTWEAFSGIGSFLRLAVPSALMICLEWWSYEL<br>LVLLSGILPNPALETSVLSICISTVVLVYNLPHGIGTAASVRVSNELGAGN<br>PEGALVVGVALSVILCSAVLVSVTLLALRHFFIGIAFSNEEEVINYVTRMVP<br>VLSISVITDSLQGVLSGVSRCGWQLGAYVNLGAFYLVGVPVALFFGFA<br>MHLGGMGFWMGMVAGGATQVTLLSITAMTNWRKMAEKARDRVFEE<br>RIPTQSV |
| 2     | Os01g49120 | MAAAAREEQPLLLRREEGEEEGEEVGVRRRWGSEAGKLAYLALPMVA<br>VSLTNYAVQVFSNMMVGHLPGLPLSSAAIATSLASVTGFSLIGMASA<br>LETLCGQAYGAKQYHTLGVHTYRAILTLLVVCIPLSLLWVFMGKILVLIG<br>QDPLISHGAGRYIVWLIPGLFANALIQPITKFLQSQSLIMPMLVASVATLV<br>FHIPLCWLMVFKTGLGYTGAALSISISYWLVNAMLVAYILLSSSCKETRT<br>PPTIEAFKGLDGFRLALPSALMICLEWWSFELLILMSGLLPNPELQTSVL<br>SICLTSITLLFTIPYGLGAGGSTRVANELGAGNPEGARSAVYVVLVAVT<br>EALIVCGTLLASRLLGRAYSEEEVISFVAMMVPLVCITVVTDLQGV<br>MSGIARGCGWQHLGAYVNLGSFYLLGIPMAILLGFVLHMGAKGLWMGI<br>VCGSISQITLLSAITFTNWQKMAENARERVFSEKPTEPSRYHLVE                |
| 3     | Os01g56050 | MAPPAGTEAAGAGHRKNWRGESGNLWRIAGPVILTEIFQLIGFVTAAF<br>VGHIGKVELAAVSVVNGVVEGLAFGLLVKNHARTLGMGSALETLCGQA<br>VGAGQPRMLGVYLQRSWVICLATSALLPLYLLASPALRLLRQSAAISSV<br>AGRYARWCAPQLFAYAVNFPMQKFYQAQSRVWAVTAISAAALAAHAL<br>LNWLVVARLGHGVVGAALVGDVSWWLLNAAQFAYLVGGSFPEAWSG<br>FSRKAFTSLGGFVKLSLSSAVMLCLEMWYYTAVLILVGLCKNPEIQVGAI<br>SICMNYQLWTLMVAVGFNAAVSVRVANELGANHPKAAKFSVIVAVVTS<br>AAVGLVFTLVVALVARKQLPRLFTDDDVLVRETAKLGYLLAATIFLNSIQP<br>VLSGVAIGAGWQSSVAFVNIGCYLLVGLPIAAVFGFRLSLNATGIWVGM<br>LIGTILQTVILLVILYRTKWQKEAMLAEERIKVWGGGVELPTIQEAS                |

4 Os01g69010 MARSSAPESMEADHQLTATVTAASGDMPVTEQQQKQMVAVAAPP  
 ATENADAAGGGGDNGDHLPTATSLLGGARRTGLHLFVLNARSALRL  
 DELGAEVLRIAVPASLALTADPLASLIDTAFIGRIGSVEIAAVGVAIAVFN  
 QVMKVCYIPLVSVTTSFVAEEDAILSKGAAGADDDNDDGHDAKGHGAS  
 AAAVADPEKQQVVGVDSAETNGAEVSTAAVRTTDDKAAAAGVGVG  
 KCRRRFVPSVTSALIVGAFLGLLQAVFLVAAGKPLLRIMGVKPGSPMMIP  
 ALRYLVVRSLGAPAVLLSLAMQGVFRGFKDTKTPLYATVTGDLANIAL  
 DPILIFTCRFGVVGAAIAHVISQYLITLIMLCKLVRKVDVIPSSLKSLKFRR  
 FLGCGFLLARVVAVTFCVTLAASLAARHGATAMAAFQICAQVWLASS  
 LLADGLAVAGQALLASAFKKDHYKVAVTTARVLQLAVVLGVGLTAF  
 LAAGMWFGAGVFTSDAAVISTIHRGVVGVAAV TIPCLVLLSSHGGFVG  
 IWIALAIYMSVRAFASTWRMGAARGPWKFLRK

5 Os02g02980 MSAHLRLLSAAPLPALLPTRRLPAVPTPALAARAARLVLSRPLTEPQPPR  
 LPRGAAARCRGVAVAGADGDEPAAAAAGTAGLWEQVRDIVVFAGPAL  
 GLWICGPLMSLIDTMVIGQTSSLQLAALGPGTVFCDYLCYIFMFLSIATSN  
 MVATSLAKKDEELAQHQVSMMLFVALTCGLGMFLFTKLFGTQVLTVFT  
 GSGNYDIISAANTYAQIRGFAWPAVLVGLVAQSASLGMKDSWGPKAL  
 AAASVINGVGDLLCSVCGYGIAGAAWATMVSQIVAAFMMMQLNKR  
 GFRAFSFTIPSSSELLQIFEIAAPVFITMTSKVAFYALLTYSATSMGAILA  
 AHQVMVNLVCMCTVWGEPLSQTAAQSFPELIYGAKCNLMKARMLLKS  
 LVMIGAITGTTVGAVGTLVPWLFPSLFTNDFMVVQQMHKVLIPYFCALL  
 VTPSVHSLEGTLLAGRDLRFLSQSMGACFGIGTFLLMIIRNKFGSLPGCW  
 WILVLFQWGRFGSALQRLLSPTGMLYNENFNNHHDEYVKVKAT

6 Os02g45380 MSSPRRDGRGAVDDLTAALLHKGDGGEAVFVVVVVPPVAEEEEPPVLT  
 CKPPGRFARAVKEAWSVPFPMPSMSAGAAGAEARSILGLALPMILTGL  
 LLYLRSMISMLFLGRLGGLALAGGSLAIGFANITGYSVLSGLAMGMEPIC  
 GQAFGAGHYDLLGVTMQRTVLLLVAASVPIAGLWVHMRPLLLL CGQD  
 AAIAAVAETYILASLPDLLLQAFVHPVRIYLRTQSINPLTVCAALAIALH  
 LPINYVAVSVLGLGIKGVVALASVLANLNLVLFVFGYIWFVHKVHKRTGGF  
 ALSADCLRGWGELVSLALPSCISVCLEWWWYEMILLCGLLANPQATVA  
 SMGILIQTTS LIYIFPSSLGFGVSTRVSNELGANRPERACRAATVGLMLGF  
 AFGGVASAFACHVRGAWATMFTADPAIVALTASVLPILGACELGNCPQT  
 TGCGVLRGSARPKDAASINLRSFYLVGTPVALILAFWYHYDFRGLWLGL  
 LAAQATCVVRMLLVIGETDWTAEAKRAQQLTGAADIKDCGGKGDHVA  
 VIEQPDEQC

7 Os02g57570 MAYTEPLLLSARHTTQTSRHHLLRSRHAAAAAADGRMVVAVQDDET  
GALVAAVKGKDEDDDDDDAVAGEEDEDDEDDAPVVRTARGAWEVFAA  
ESRRLWAIGAPIAFNVICLYGTNSTTQIFVGHIGNRELSAVAIGLSVVSNF  
SFGFLGMGSALETLCGQAFGAGQVAMLGIMQRSWIILAASAALLSPL  
YVFAGPILRLLGQEEESIAAAAGEFTVRIIPQMFALAINFPTQKFLQAQSKV  
TVLAWIGFAALLAHVGLLALFVSALGWGIAGAAAAYDVSSWLTAQAQ  
AYVVGWCRDGTGLSRKAFNELWAFVKLSLASAVMLCLEIWYMMVL  
VVLTGHLDDAEIAVDSISIWYSLLP

8 Os03g08900 MGDGRGDEEECRVALLNNGGAAKEGWQVVSAGDGLRRRVWEESRK  
LWVIVAPAFSRVVTYSMNVTQAFAGHLGDLELAAISIANVTVVGFNFG  
LMLGMSALETLCGQAFGAKKYHMMGVYMQRSWIVLLACAVLLLPM  
YIYAEDVLLLTGQPPELSAMAGRVSVWFIPHLHLSFAFLPQRFLQCQMK  
NFASAAASGVALCVHVAISWLLVSRFRFGLVGIALTNFSWWATAAML  
FAYVACGGCPETWNGLSLEAFAGCHAMLLTEFVCLICSLENWYYRILIL  
LTGNLKNAAIAVDALSICMTINAWELMIPLAFFAGTGV RVANELGAGNG  
KGARFATIVSSVTSLVIGLFFWVLIVGLHDKFALIFTSSDVVLDVNDLSV  
LLAFTILLNSIQPVLSGVAVGSQSMVAAYVNIGTYYLIGIPMGILLGWL  
FKLGVLGIWAGMIGGTAVQTLILAIITIRCDWDKEAMIASTRMDKWSQV  
R

9 Os03g11734 MAGLKKMEEVTA AAAA VAASSTA EKRAAAVVPDAALTMNGAAGAE  
EKTA AAAA APEDLPAPAALSGWPRRVGLYLFVMNIRSVFKLDELGSEVL  
RIAVPASLALAADPLASLVDTAFIGRLGSVEIAAVGVSAIFNQVSKVCIY  
PLVSVTTSFVAEEDAHSKCIENSSQDLEKASPVDSETNNLPVSGPDKVE  
CVNSCIPTECTNPSDQGCKRKYIPSVTSAVIVGSFLGLLQAVFLVFSKQV  
LNIMGVKNDSPMLRPAVRYLTI RSLGAPAVLLSLAMQGVFRGFKDTKTP  
LYATVVGDAANIILDPILMFVCHMGVTGAAVAHVISQYLITMILLRILR  
QVDVIPPSLKS LKFRFLGCGFLLLARVAVTFCVTLASSLAARHGPTIM  
AAFQICQWLWATSLLADGLAVAGQAVLASAFKNDKGKVVVATSRVL  
QLSIVLGMGLTVVLGVGMKFGAGIFTKDIDVIDVIHKGIPFVAGTQTINSL  
AFVFDGINFGASDYTYSAYSMVGVA AISIPCLVYLSAHNGFIGIWIALTIY  
MSLR TIASTWRMGAARGPWWFLRK



10 Os03g12790 MCNSGTSSSPSAPAPPPPPLTSFKHSSHLLRLVDDDADDGHALLLSKVAG  
EAQAIGRVSVPMVAVTGLVMYSRALISMLFLGRLGELALAGGSLALGFAN  
ITGYSVLSGLALGMEPICGQAFGARRGKLLALALHRTVLLLLAVALPISL  
LWVTSTGYILKQLGQDEGVADAAQTFAAYASADLAVLAVLHPLRVYLR  
SQNLTLPIACSLFSVLLHGPNYLLVVRLRMGVAGVALAVALTDLNLLL  
ALLCFLAISGAHRDSWVGPTSDCLRGWPALLRLAVPTATAVCLEWWW  
YELMIVLSGLLANPRATVASMGIQATSLVYVFPSSLGQGASTRVSHQL  
GAGRPAGARRAAGAALSIGLVVGAATAFMVSVRSHWGRMFTSDGEIL  
RLTAVALPIAGLCELGNCPQTAGCGVLRGSARPASGARINLASFYLVGM  
PVGVALAFGARLGFAGLWLGLLAAQAACAVWMARAVAATDWDVEVA  
RAKELTKASTTGSNTNHQHECNNSNTNTANAKANTKTTTSPAANNINA  
GGGGSSDNRGYVPISESGHNDGSDDLEKLEELMVATSGGCCGCGDAL  
GVDTKAGDKQQCSNGGAGTAEGNAGQRRGSASSERAPLISVGDDEEAG  
EENDGDGGGGGHV

11 Os03g37411 MAGGDQRGDSPPSHELGRLEGILADGEAPWARRACKAAALEVRLAPI  
AAPAIVVYVPNNVLSISTQIFCGHLGNLELAASSLGNNGIQIFAYGLMLG  
MGSAVETLCGQAYGVHKYDMLGVYMQRSTVLLMATGVPLAVIYAFSR  
PILVLLGESPEIASAAAVFVYGLVPQIFAYAANFPIQKFLQAQSIVAPSAY  
TSAATLVLHLVVGWLVVYQLGMGLLGASLVLSLWWVIVAAQFVYIA  
ASKRCRRTWTGFSWMAFSGLPEFLKLSTASAVMLCLETWYFQILLAG  
LLDDPQLALDSLVCMTLAGWVMMISIGFNAAASVRVGNELGAGHPRA  
AAFSVVVVTAVSFVITVVMVFLMFRDYISYIFTEGETVARAVSDLCPF  
LAATLILNGIQPVLSGVAVGCGWQKIVAYINVGCYFVGIPLGFLGFKF  
HLGAKGIWTGMLGGTCMQLLILFWITFRTDWNKEVEEAKKRLNQWED  
KKQPLLAGTVDY

12 Os03g37470 MATTAASPEIAGAARLYVVGLIPQIFAYAANFPIQKFLQAQSIVAPSAYIS  
AATLAAHVALSWFAVYKLGGLGASLILSLSWWVIVLAQFAYIVVSDR  
CRLTWAGFSSKAFSGLPEFLQLSAASAVMLCLETWYFQVTVLIAGLLKD  
PEIALDSLAVCMSISGWVFMVSVGFNAAASVRVSNELGAGNPRAAFSV  
KVVTSLSLIVAAIIAIVMCLREYLSYVFTQGEEVARAVSSMTPLLAVTIV  
LNGIQPVLSGVAVGCGWQAFVAYVNIGCYIIGVPGCVLGFHFDLGAM  
GIYGGMIVGLFVQTLILVYVTFRTDWNREVGEAKKRLNKWGDIAKPLL  
ANED

- 13 Os03g37490 MGSSVKDAGGGKEEQQLLESPLLEAAVSSGGGDGGGGHGVSGELESILGDETVPWARRMWAATGVEMRLMLRLAAPAVLVYMINYLMSMSTQIFSGHLGTLELAAASLGNTGIQVFAYGLMLGMGSAVETLCGQAYGAHKYDMLGVYLQRSTVLLMATGVPLAVIYAFSRPILVLLGESPEIASAAAVFVYGLVPQIFAYAANFPIQKFMQAQSIMAPSAYISAATLAFHLVLSYLVVYQFGLGLLGASLMLSISWWVIVVAQFIYIVTSRRCRLTWTGFSMLAFSGLPDFFKLSLASAVMLCLETWYFQILVLIAGLLKDPEMALASLVCMTISGWVFMISVGFNAAASVRVSNELGAGNPKSAAFSVVVTVLSFFLSVVISLVILLCRDYISYIFTDGEDVATAVSKLTPLLALTLILNGIQPVLSGVAVGCGWQAFVAYVNVGCYYIVGIPLGCLLGFYFDLGAAGIWSGMIGGTLMQTLILMWVTFRTNWNREVEEAMKRLNKWEDKTPLLSE
- 14 Os03g37640 MAGGVSDGGAAHGASGRLESILSDSSMPLARRAWAATTIELGLLTRIAAPAVVMYMINYLMSMSTQIFSGHLGNLELAAASLGNNGIQMFAYGLMLGMGSAVETLCGQAFGAHKYDMLGVYLQRSVLLTITGVPLAVIYGFSEPILVFMGQSPEIARAAAFVYGLIPQIFAYAINFPIQKYMQAQSVLPSAYISAATLALHVLLSWVVVYKVGGLLGASLVLSISWWVIVAAQFAYIVTSPTCRHTWTGFTWQAFAGLWDFLKLSAASAVMLCLESWYFQVLVLIAGLLPNPELALDALSVCMTISGWVFMISVGFNAAASVRVSNELGAGNPKAAAYFSVWVVTISCAIISAILAVVILCLRNYISYLFTEGEVVSNAVADLCPLLAITLILNGIQPVLSGVAVGCGWQQFVAYVNIWCYYIVGVPLGVLLGFVFKLGVKGIWGGMLGGTCMQTAILVWVTLRTDWNNEVEEAQKRLNKWEDKKKEPLLTGIRDNN
- 15 Os03g42830 MGKLVSKSWQESKLLWHIAFPAILTAVFQFSIGFVTVGFVGHIGQVELAAVTVVENVIEGFAYGVLLGMGSALETLCGQAVGAGQVSMGLGVYIQRSWIICGATAVILTPTYVFTAGILIGLRQPTDIAAVAGTYTRWVIPQLFAYAANFPLQKFFQSQSKVWAMTAISGIALALHVVLNYIFLTRLGHGLVAAALIGNVTWWLILAQFIYLVSGCFPEAWKGFMSMLAFKNLAAFVKLSLASAIMLCLELWYYTAVLILVGLLKDAKLQVDVMSVCINYQLWTLMVALGFNAAVSVRVSNELGANRPKAAKFAVAMAVSTSAIVGAVFMAVFFIWRWRTQLPRFFSDDADVRESAKLGYLLAATIFLNSIQPVLSGVAIGAGWQSLVAFINIGCYLVGIPLGVLFQFKLKDAMGIWVGMSLGTLLQTAILAFISFRTKWERQAMMAEERIREWGGRNDDALPSTTTTPTADDHNVDR

16 Os03g62270 MAIPLQGKAQQQQGEGGKGDGAVDDDGDQPSVASELRELWGMAAPI  
TALNCVVYL RAMVSVLCLGRLGPLDLAGGALAIGLTNITGHSVLFGLAS  
GLEPLCAQAFGSKNYDLLTSLQRAVLLLTLAALPIALLWLHVGPILVAL  
GQDPTISASAAAYAYALPDLAASAVLQPLRVYLRVYLRSGITKPMACSAI  
AVALHVPLNVLLVFGLGFGVIRGVAAAQALTNTNMVLFLLAYIRWSRAC  
DATWKGWARPAAVASGLAGLVRLAVPSCVGVLEWVWYEVVTVLAG  
YLPDPAAAVGAAGVLIQTTSLMYTVPMALAACVSTRVGNELGGGKPRR  
ARMAAMVALGCVVIGVVHVAWTAAFSREWVELFTREAAVVRLLLL  
AMPILGLCELGNCPQTTGCGVLRGTARPAVGARINLLSFYLVGTPVAVT  
LAFGARVGFGLWYGLLSAQACVALVLLAVVWRDWHLEALRAKK  
LTGLEMIAAAAEGDDDECKRLIAPLPPPDGHDVAVDVV

17 Os03g64150 MTPPPSPHERKTWAESVASEFRAQRGIAFPLIAMNLTWFAKLAVTTAF  
LGRLGDLQLAAGTLGFSFANVTGFAVLTGLCAAMDPICGQAHGASNGK  
LLRKTLMATILLGASIPAFWLHVDAVLLRFGQQADMSSNARSYVV  
CLLPDLAVTSFVNPLKSYLSAQGVTLPTLTFASALALALHVPLTMWMART  
RGIQGVATAVWVSDLA VAVMLAGYVLVSERRRKAGGGGGWVEQTRG  
EWRLLRLAVPSCNLCLEWWCYEILVLLTGRLPDARRTVAVMAVTLN  
FDYLLFAGMLSLSVSASVRVSNELGAGEAWAARRAGMVSIVGGAVGG  
VGGGVAMVAARRAWGSIYSSDAGVREGVGRAMEVMAVLEVNFPLN  
VCGGIVRGTARPAVGMYAVVAGFYVLALPLGVALAFKARLGIQGLLLG  
FLVGAAASLAVLLTFIARMDWPAAEQKARTRTTATVAQFHQHDEVVQP

18 Os04g30490 MAAPSMEEPLLGGGNGEEKKGGSSRLAVVAEVRKQLYLAGPLIAGWL  
LQNVVQMISVMFVGHGGELELSSASIATSFAGVTGFSLLAGMASSDLTLC  
GQAFGAKQHRLVGVYKQRAMVVLGLASVCVAAVWAYTGELLLLFGQ  
DPEIAAAAAGSYIRWMIPALLAYGPLQCHVRFLQTQNAVMPVMLSSGAA  
AACHLPVCWLLVYGAGLGSKGAALANAVAYLANAAALAAAYVRLSPAC  
RSTWTGFSSEAFHDLVGFMR LAVPSALMVCLEWWSFELLVLLSGLLPNP  
KLEASVLSICLNSGSLAFMIPFGLGSAISTRVSNELGAGRPEEARLASRVV  
MALGLVVGVAIGLAMILVRHLWGYAYSNEEEVVQYVAKMMPILAVSF  
LFDDLQCVLSGVARGCGWQKIGAVNLGAYYLVGIPAALCFAFVYHLG  
GMGLWLGIMCALIVQMLLLLAITVCTNWEKEALKAKERVFSSSLPADM  
T

19 Os04g48290 MTTCADDQTGCAFFAPLLSSKGAEVVILVAGDEAEEQQPAPVLTSKPPG  
RLAKAVNEAWSVSLGVAFPVTPSMFTCSARGEARSILGLAFPMILTGLLL  
YLRSMISMLFLGHLGGLALAGGSLAIGFANITGYSVLSGLAMGMEPICG  
QAFGAGNYALLGVTMQRTVLLLIAAAPIGGLWVQMRPLLLFCGQDAAI  
AAVAETYIFASLPDLVLQAFLHPVRIYLRTQSINLPLTVCAGLAIAIHLPIN  
YVLVVVLGLGVKAVALASVLANLNLVLFLLAYIFLKGVHKRTGGFLLS  
AESFRGWGELISLALPSCVSVCLEWWWYEIMILLCGLLLNPQATVASMG  
ILIQTTSLIYIFPSSLSFGVSTRVSNELGAGQPEEASRAATVGLVLGFGFGA  
FASAFALVRNVWASMFTADPAIVALTASVLPILGLCELGNCPQTTGCG  
VLRGSARPKDAASINLRSFYLVGTPVALVMAFWFHLDLFRGLWFGLLAA  
QATCTVRMLLVIGRTDWAAEAKRSKQLTGAGAANMESDDRVAADEKS  
RLPVDTDVERSSDHTDRC

20 Os05g48040 MEERIPLLSKRFPADGTAGVGGGREEEGDRWWSGLAREAGKVGSM  
LPMAAMSVAQNAVQVASNMMVGHLPGLPLSASAIATSLASVSGFSL  
VGMASGLETLCGQAYGAKQYDKLGVQTYRAIVTLTVVTIPISLLWVFIG  
KLLTLIGQDPVISHEAGRYIVWLIPGLFAYAVCQPLTKFLQSQSLIFPMLW  
SSIATLLHIPLSWLLVFKTSMGFTGAALAISISYWLNTFMLAAYIRFSCS  
CKVTRSPPTIEAFRGVGLFLRIALPSALMLCFEWWSEILVLLSGLLPNE  
LESSVLSICLTTTSLMYTIPYGLGGAASTRVANELGAGNPEGARSVHLV  
MSIAGTEAVLVTGMLFAAQIRILGYAYSSDEEVVITYFTSMVPFVCISVAA  
DSLQGVLSGIARGCGWQHLGAYVNLGSFYLVGIPVALLLGFQFKMEGK  
GLWLGACGSVLQFLLAVIAFFSNWQKMAEKARERIFGETPSEKQHLV  
LDATNSV

21 Os06g29844 MAAKGSPEEEALLAGVGGDHQLVESDELAPAAA VVREEVKKQLWLAV  
PLVAGALLQNVIQMISVMFVGHGELPLAGASMASSFASVTGLSLLLGM  
ASALDTLCGQAFGSRQYHLLGVYKQRAMLLLTAVSVPLVVVWFYTGDI  
LVAFGQDADIAAEAGAYARWMIPALFAYGPLQCHVRFLQTQNVVLPVM  
ASAGAAALCHLVVCWALVYAAGMGSKGAALSNAVSYWINVAILAVYV  
RVSSSCKKTWTGFSMEAFHDPLSFFRLAIPSALMVCLEMWSFELIVLLSG  
ILPNPKLETSVLSISLNTAAFVWMIPFGLGSAISTRVSNELGAGRPRARL  
AVRVVVFMAVSEGLVIGLVLVGVR YIWGHAYSDEEEVVITYVAKMMLV  
IAVSNFFDGIQCVLSGVARGCGWQKIGACVNLGAYYIVGIPSAYLIAFVL  
HVGGMGLWLGIIICLLVQVLLLMAITLCTNWDKEAANAKDRVFSSSLPS  
DLAT

22 Os06g29950 MASALDTLCGQAFGAQQYHLLGIYKQRAMLLLTAVSVPLAVVWFYTG  
DILRLFGQEADIAAEAGTYARWMIPALFAYGLLHCQIRFLQTQNVVLPV  
MAAAGATALCHLLVCWVLVYAAGMGNRGAALSNAVSYWINVAILAV  
YVRVSSSCKKTWTGFSTEAFRDALGFFRLAVPSALMVWSSSQPKAADV  
RAINQPQHCFGLGVDDPLWPRLCHKSKQEIERDGRWTPILRRPKGSGWIG  
AAIAIITGNHRLVTATISTTHAIFTIRGDENIGGFTWQLGVIFDKYGERFI  
NRDNHHEVFILGVQTFEHVVGRLEIJSVELAITFNRRTRVSNELGAGRPH  
ACLAVRVSVMFAISEGLVIGLVLSVRNIWGHAYSNEEEVVKYVGKVL  
LVISVSNFFDGIQCVLSGVARGCGWQKIGACVNLGAYYIVGIPSAYLIAFI  
LHLSGMGLWLGITCGILVQVVLLMAFTLCTNWDKEAANAKHRALNSSL  
PSDTAT

23 Os06g29994 MEKASCLEEALLLPESCKEEETASDEVKRQLRLAGPLIAGSLLQNLIQMI  
SVMFVGHGELPLAGASMASSFAAVTGFSLLLGLASALDTLCGQAFGAR  
QYHLLGVYKQRAMLLLTAVSVPLAVAWYYTGDILLFGQDADIAAEAG  
AYARWMIPALFAYGPLQCHVRFLQTQNMVVPVMAAAGAAALCHLGV  
WALVHAAGMGSRGAALGNVSYWINVGVLA VYVRVSRCKKTWTGF  
SMEAFRDPLSFFRLAIPALMVCLWWSFELLVLLSGLLPNPKLETSVLSI  
TLNTANCLFMIPFGLGAAISTRVSNELGAGRPRARLAVRVVTLATLEG  
LGMALVLACVRYVWGHAYSNEEEVVA YVAKMMLVLA VSNFLDGIQC  
VLSGVARGCGWQKIGACINLGAFYVVGVPAA YLA AFVLRAGGLGLWM  
GIICGVAVQTLFLAITSRTDWQKEAKMAKDRVFSSSLPTDLAT

24 Os06g36330 MCTTTSAPSVPEVATPADGGGHHVYVSLPQCTDGGDVEGGHCRPVVHQ  
VKCRGGDDGGGGGRGGGVMPAAGETVREAAALCRLACPIALTALM  
LYSRSALSMLFLGSLGDLPLAAGSLAVAFANITGYSVLSGLSLGMDPLCS  
QAFGARQPRLLGLTYRSVFLLCSSLPALSALWLNMAKILLFLGQDRDIT  
AMAQDYLLFSLPDLFSFLIHPLRVYLRSGITQPLAVAAAAAVVHVPA  
NYVLVGRRLRGAPGVAAAASANSFVLLAVLLAYVARRDEALREAGPT  
AEWLAGWGPLARLAAPSCVSVCLEWWWYEMILLCGLLPEPRPAVAS  
MGVLMQTTALVYVFPSSLGFGVSTRVGNELGANRPRARAAAHVAVA  
GAAAMGLAAMAFATGMRHAWGRLFTADADILRLTAAALPVVGLCELG  
NCPQTVGCGVLRGTARPARAAHVNLGAFYLVGMPVAVVLAFLGLGVGF  
VGLWVGLLAAQVCCAGMLCVVGGSTDWEAQARRAQALTSSAAVSGK  
ADAAEGGGRWPEKGEHQEWKRRHVALISSEADPETAEVL

25 Os06g49310 MSGGGGEVEAAAEAAPLLVPHDPQPAVGAEVRRQVGLAAPLVACSLQ  
YSLQVVSVMFAGHLGELSLSGASVASSFANVTGFSVLLGMGSALDTFCG  
QSYGAKQYDMLGTHAQRAIFVLMMLMGVPLAFVLAFAQILIALGQNPEI  
SSEAGLYAVWLIPGLFAYGLLQCLTKFLQTQNIHVPLVVCSGATLVIHIL  
LCWVMVHCFDLGNRGAALSISLSYWFNVILLAIYVKVSEVGRRSWPGW  
SREALKLDVNMVYLRALIPSTFMTCLEYWAFEMVLLAGFLPNPKLETS  
ILSISLNTMWMVYTIPSGLSSAISIRVSNELGARNPQAARLSVVFVSGIMCL  
TEGILVAIITVLRDIWGYLYSNEEEVVKYVAAMMPILALSDFMDGIQCT  
LSGAARGCGWQKVCVINLCAYYTIGIPSAVTFAFVLKIDGKGLWLGIIIC  
AMTVQILALVVMLLRTSWNEEA EKARARVQGS DGRITLA

26 Os07g01750 MQDQRAGPAKSKEKKRVS RHKQAKLTTVIIKAVPLTTKELRQKKSELRV  
ERRRVKMGDERAVAAPLLQQQDGGGGDGERRRRRWWGWWDGE  
EAAGQLAFAAPMVATSMAYYAIPLVSVMYAGRLGELELAGATLGNSW  
GTVTGIAMPWLNIRGVLAAGLQKDKLDTGLSGSLETLCGQGYGAKM  
YHMMGVYQLQASIITSAFFSVLVSLWVYSEPVLI FLRQDPEVTRTATLFLR  
YSIPAQFAYGFIQCTLRFLQTQS VVTPLVVFALLPLVLHFGITHAFVHYLG  
FGYAGAGMSTSVSLWLSFLMLAAAYVCLSERFKHTWEGFSTEAFRHVLP  
GLKLAIPSAVMVCFEYWAFEVLVLVAGLMPNSHMSTSIAMCENTE AIS  
YMITYGFAAAISTRVSNELGAGNVAKAKKALAVTLVLSLLLGVAFLLLL  
GLGHDLWAGLFSKSDA VISEFASMTPLLIGSVVLDSTQGVLSGVSRGCG  
WQHLLAAWTNLVAFYIVGLPLSILFGFKLGLQTKDQMGKIRADNERQRR  
RFCLRLRERSELTS LAAAYASLVESNIEVKSFRA

27 Os07g31884 MSHFRQVRGAHAASSLLPFSHRPPRATTTTTTPPRPNRCRRLHIHSSASHH  
HIHNQLRHRRA SHHRRREIVVVVRCSGRDDDGVMASTDPLLGGKEEE  
EGGGEVRRARRWWVGRVVDTEEAWAQTRFAVPMVLTNMSYYAIPLVS  
VMFSGHLGDVHLAGATLGNSWATVTGYAFVTGMSGALETL CGQAYGA  
RMYRMLGLYLQSSLLMSAAVSVLVSALWCFTEPLLLLRQDPAVSAAA  
SAFVRAQVPGLFAFSFLQCLLRYLQTQS VVAPLVACSLAPFLHVALAH  
LLVNALGLGLAGAGAAVSITFWASCLMLLAYVLRSERFAETWNGFSAE  
AFRFVPTIKLATPSAVMVCLEYWAFELLVLIAGLLPNPTVSTSLIAMCSS  
TEAIA YMITYGFSAAVSTRVSNEIGAGNVEGAKNAVA VTLKLSVFLAAA  
FVLLLGFGHGLWAGLFSGSAIIAAEFAAVAPLMMASILLDSAQGVLSGV  
ARGCGWQHLLAAVTNLVAFYVIGMPLSIFFAFKLKWYTKGLWMGLICGL  
TCQTCTLMVITARTKWSKIVDAMQEKKASYVA



28 Os07g33310 MGHAVDGRLEALLSGGGGGGEEAAPWARRMAAAALELRL LAPLAAP  
AVVVYMLIIVMSSATQIFCGQLGNVQLAASSLGNNGIQVFAYGLMLGM  
GSAVETLCGQAYGAGRHEMLGVYLQRSVLLTAAGVPLAALYACSER  
VLLLLGQSPEISRAAAGFARGLIPQIFAYAANFPIQKFLQAQSIVAPSAAV  
LAASFALHLPLSWAAVRVLGLGLPGAALALSATWWVLVAGQFAYIVRS  
PRCAATWTGFTWAAFHDLAAFARLSAASAVMLALEVWYFQVLILLAG  
MLPDPQIALDALTVCTSIQSWVFMISVGFNAAASVRVGNELGAGNPRSA  
AFSTWMVTALSAAIAIAGVVVILLRDKLSYIFTQGEAVSRAVSDLCPLL  
VGTIVLCGIQPVLSGVAVGCGWQALVAYINIGCYYLIGLPLGVLLGFKFD  
YGIKGLWGGMIGGTLIQTLILIWITFRTDWNKEVEDARRRLDKWDDTKQ  
PLLVNRQ

29 Os08g37432 MEDEATSVAAPLLRPRGGVDAAEVKQLWPAGARVAGEWWVESKKL  
WRVVGPAIFQRIALYGINVVSQAFIGHMGDLELAAFSIASSTVVAGFNFGF  
LLGMASALETLCGQAFGAKKYHMLGVYLQRSWL VLLMFAVALTPTYV  
LMEDLLLIGQPADLASLAGKMSVWLLPQHAFAMALLPLTRFLQSOLK  
NWVTAVTAGVALALHLVITYLLVNTLHLGLLGAVAAANVAWWIVVLG  
QLVYVVGGWCPLSWKGFSEAFADFWEFIKLSASGVMLCLENWYYR  
VLVLLTGYLNNAEIAVDALSICLTINGWEMMIPFGFLAATGVRVANELG  
AGSGKGARFAIVSVTTSVAIGLVFWCLIIAYNDKIALLFSSSKVVLDV  
SDLSVLLAFTVLLNSVQPVLSGVAIGSGWQALVAYVNVGSYYLVGVPIG  
AILGWPLHFGVGGIWSGLIGGTAVQTLILAYLTISCDWDEEAKKASTRM  
EVWASSK

30 Os08g43250 MCHCSSKVVAVAQCHQPLPPPEACPALHDRPRSARGGGGAIAEVASIV  
RLAMPVVGAGLLMYMRSLSMLFLGRLGRLPLAGGSLALGFANITGYS  
VLSGLAAGMDPVCQAFGAGRTSVLAAALRRTVVLLLAASVPIAALWL  
AMHRVLVAAGQDPDIAACAYEFILCSLPDLAVQSFLHPLRVYLRAQSITL  
PLTYAAAAALALHVPVNVLLVHGLGLGIRGVALAAVWTNLNFFLFLVA  
YAYFSGLIRGDDDDGGNGKAGEEGATTTTTTMEWGWLVKLSVHSCM  
SVCLEWWWYEIMVLLCGVLADPKAAVAAMGILIQTTSLLYIFPHSLSCA  
VSTRVGHELGAGRPERARLAARVGLACGAALGVVACAFASLRGVWA  
RMFTADATILRLASSALPILGAAELGNCPQTVGCGVLRGSARPGRAARIN  
VSAFYGVGMPAALALAFWPARDFRGMWAGMLAAQLVCAALMLLAV  
RRTDWDEQAARAREITGAVAGVVVGDGDVVVKGDHADA AKVKADSG  
LLVVTVLS

31 Os08g43654 MSSTSGSAWDHSNNGGGGSPELREALLLGDGGSSPESREIKGIAVKKQD  
DLEEIRSVGELMRLAAEENRRLWYLAGPAIFTSLAQYSLGAVTQVFAGH  
LTTLELDAVSTENMVIAGLAFGIMYGMGSALETLCGQAFGAKQHHMLG  
IYLQRSWVILTAMSVILLPIYLFATPILRFFHQDDEIAVLASRFSLYMIPQL  
FAYALNFIQKFLQAQSKVMAMAAVSAAVLLFHVALTWLLVPLRMGL  
VGLAVALNVSWWLVVLGQLAYIVMGYCPGAWNGFDWLAFTDLLSFAR  
LSLGSAIMICLEFWFYMFLIVIVGNLPAQVAVAAVSICTNLFGWQIMVF  
FGFNAAISVRVSNELGAGRPRARLAIAVVLVSSVAIGVAFFAAVLLLRD  
VYGAPFTGSPEVVRAVASLGVVFAFSLLLNSVQPVLSGVAVGAGWQWL  
VAYINLGCYYCVGIPVGYAIAFPLRRGVQGMWGGMLTGVGLQTAILVAI  
TARTNWNKEASEAHARIQHWGGTAKLAVDDPI

33 Os08g44870 MGSVSPPAPEEDAAAVESAGAAARMFWHETKRLWAIGTPIAIGTITNYAI  
SSVTTFMFIGHLGNLPLAAASVGLSVFATFALGFLLGMGSALETLCGQAF  
GAGQVSM LGVYLQRSWII LLGATVLMVPVYVLAEP LLLL VGQDPEVAR  
AAGRFTLYILPGAFAFVNFPSGKFLQAQSKVGVLAWIGVAGLAFHVGI  
TYLAVSVLWGLPGAAAAYDVSQWASSLAQVAYIMGWCREGWREGWS  
MAAFHDLAFLRLSIESAVMLCLEIWYLG LITVLTGDLDDAQM AVDSL G  
ICMNINGYEGMIFIGLNAAISVRVSNELGSGRPRAAMHAVVVVVAESLLI  
GLLCMALVLA FSDKLALVYTS DAHLLRAVSRIAGLLGVTMVLNSVQPV  
LSGVAVGGGWQGLVAYINLACY YLFGLPVGYLLGYYFNLGVGGVWGG  
MLCGVALQTLILLFVWVRTDWKAEAAQASARVHKWGGTDETKPLLQG  
DHSDRD

34 Os09g29284 MASVPLLAEWPAGKEKEEGRVRRRLPALAREAWEEKKLWEIVGPAVF  
LRLVLYSFNIISQAFAGHIGDLELA AAFSIANNVITGLNFGFLLGMASALET  
LCGQAYGAKQCSMLGIYLR SWIILFVFAVLLVPTYVFTAPLLEALGQPA  
ALARKAGMVS VYMLPSHFQYAVLLPLNKFLQSQRKNWVTVV TAAAF  
PVHIAVSWLLVSRLRFGVLGAAMSLGVSGWLVTLLQLAYV VGGGCPVT  
WSGFSP LAFVDLWGFVKLSVSSGVMVCLETWYYKILILLTGHLKNSELA  
VNALSICMSFQSWEMMIPVGF LAGTGVRVANELGAGNGK GAKFATIVS  
TTTSFLIGLFFSALALAFHDKIALVFSSSNAVIDAVDNISFLLAVTILLNGV  
QPVLSGVAIGSGWQAAVAYVNIGCY YFIGVPIGVLLGWSFNLGVFGIWA  
GMIAGTAIQTIILAHMTIQCDWNKEVLQASERVQRWGNPK

35 Os09g35600 MASRHSDEATQCHQQLLVMPAATASYPKLHDRPRLAGAAAGVLGEVA  
SILCLAGPMVGAGILLYLRSLVSMVFLGRLGQLPLAGGSLALGFANITGY  
SVLSGLAGGMDPVCGQAFGAGRDLRAALRRTVVLLLAASVPISALW  
VAMHRVLVATGQDPDIAATAYAYILCSLPDLAVQCFLHPIRIYLRAQSVT  
LPLTYAAAAALLHVPINVVLVDRLGLGIRGVALGAVCTNLNCLFLAA  
YVCLSGMYGGRAKACASAAAPAAGEEDDDGGVREWWSLVRLSVHSC  
MSVCLEWWWYEIMVLLCGVLADPKAAVAAMGVLIQTTSLIYIFPHSLG  
CAVSTRVGHELGA GRPERARLVARVGVGLGAALGIVAFGFAVSVRAAW  
ARMFTAEDAILRLAAAALPLLGAELGNCPQTAGCGVLRGSARPERAA  
RINVAIFYGVGMPVALALAFWPAGLDFRGMWGGMLAAQLVCAWLML  
RAVLGTDWAEQAERARELTGGGDGYAAVA AVIVDDDKAKQHAEMDK  
PQQVDNTLLMAIDCV

36 Os09g37610 MELAGGGTG VVRQRAEPLGAGLLLRGGGRSVGGGGIGCARRATLRGLA  
LSPLARRAVSAAGGHFLPRRAVRAAAAAGDGGFYGEEDAASDQPF PAR  
ASPSDDANDSTAVRSLGGDHPGEIKKELLNLALPAIVGQAIDPVAQ LLET  
AYIGRLGPVELASAAVGVSVFNIISKLFNIPLLSITTSFVAEDVARHDS DQF  
TSEGNMSSES GGRKRLPSISSAILLAAAIGVIEASALILGSEILLSIMGVSHA  
STMHSPAKLFLSLRALGAPAVVVS LAIQGIFRGLKDTKTPLLYSGLGNIS  
AVLLL PFLVYSLNLGLNGAALATIASQYLGMFLLLWLSKRAVLLPPKIE  
DLDFVGYIKSGGMLLGR TLSVLITMTLGTAMAARQGTIAMA AHQICLQV  
WLAVSLLSDALAVSAQALIASSFAKLDYEKVKEVTYYVLKIGLLVGAAL  
ALLLFASFGRIAELFSKDPMVLQIVGSGVLFVSASQPINALAFIFDGLHFG  
VSDFSYSASSMITVGAISSLFLLYAPKVFGLPGVWAGLALFMGLRMTAG  
FLRLGSRAGPWWFLHQKEPTYKLHSSTC

37 Os10g11354 MKAAAMEEPLIAGSSGGAAEKNGGEEGLVVTEIKKQLYLAGPLV VGM  
LLQNVVQMISVMFVGH LGELALSSASMATSFAGVTGFSLLAGMASSLDT  
LCGQAFGAKQH HMLGVYKQRAMLVLALVSVPIAAVWAFTGEILLVVG  
QDPEIAAGAGSYIRWMIPTLFVYGPLQCHVRFLQTQS AVVPVMLSAGAT  
AANHVLVCWLLVHRLGLGAKGAALANAVSFLTNL SVLAIYVRLSPACR  
RTWTGFSGEAFRDVLGFLRLAVPSALMVCMEWWSFELLVLLSGLLANP  
KLETAVLSICLNTNSFAFMVPLGLGAAISTRVSNELGAGR PQAARLATRV  
VMLLAFLVGTSEGLVMVIVRNLWGYAYSNEEEVADYIAKMMPI LAVSIL  
FDAIQCVLSGVVRGCGRQQIGAFINLGAYYLAGIPVAFFFAFVCHLGGM  
GLWFGILCGLVVQMLLLL TITLCTNWDKEALKAKDRVCSSSLPKDLAT

38 Os10g11860 MEGQGLVSRSWQESKLLWRVAFPAVLVELLQFSIGFVTASFVGH LGVVE  
 LAAVTAVESILEGFAYGVLFMGCALDTLCGQAVGAGRLDVLGLYVQQ  
 SWIVCGATAVALTPTYAFAEPILRSLLRQPADVA AVAGPYALWSLPRLF  
 AHAANFPLQKFFQTQSRVWALAAISA AVLAVHAALTYAAVVRLRYGLR  
 GAAVAGNLSYWLIDAAQFVYLVSGRFPDAWKGFTMTAFSNLAAFVKLS  
 LVSAIMICLEFWYYAALLILVGLLKNARLQLDIM SICINYQFWTMMVAM  
 GFSEAISVRVSNELGARRPKEAKFSVAVASLTSAMIG AIFMSIFFIWR TSL  
 PSLFSDDKEVVDGAARLGYLLAVTVFFGNIGPVLSGVAVGAGWQILVAF  
 VNIGCYL VGIPFGVLF GFKLKL GALGIWMGMLTGTLLQMAILFFIIMRT  
 KWEAQAILAEKRIS ELGETTAND

39 Os10g13940 MNGESLLDRSSSADAAMND AVPGHRHHHPLSVFLRDARLAFRWDELGR  
 EIMGIAVPGALALMADPVASLVDTAFIGHIGPVELAAVGVSI AVFNQVSR  
 IAIFPLSVTTSFVAEEDATSSDREKYEINGENEFNVSDSEMEELVSHEEA  
 SAAPSKSSFETDSSDVKIEHKRKNIPSVSTALLGGV LGLLQALLLVICAK  
 PLLGYMGVKQGSAMLMPALKYLVVRS LGAPAVLLSLAMQGVFRGLKD  
 TKTPLYATVAGDATNIVLDPIFMFVFQYGVSGAAIAHVISQYFIASILLWR  
 LRLHVDLLPPSFKHMQFSRFLKNGFLLARVIAATCCV TLSASMAARLG  
 SVPMAAFQICLQIWLASSLLADGLAFAGQAILASAFARQDHSKAAATAS  
 RILQLGLVLG LLLSIFLGIGLRLGSR LFTDDQDVLHHIYLGIPVSLTQPIN  
 ALAFVFDGINYGASDFGYAAYSMILVAIVSIIFIVTLAS YNGFVGIWIALT  
 VYMSLRMLAGFLRIGTARGPWTFYAAQRMHSHEVVGLC

40 Os10g20350 MSSALDTLCGQAYGAGQHRL LGVYAQRAMLVLA AAAVPIALVWASAG  
 EILLFGQDPAIAAEAGAYARWMIPSLAAYVPLACALRFLQAQGIVVPV  
 MASSGVA AVGHVAVCWALVHKAGMGSKGAALSGAVTYWTNLAVLAL  
 YVRLSGACETTWTGFSIDAFRELRRFTELA VPSAMMVCLEWWSFEILVL  
 LSGILPNPQLETSVLSICLSTSSLLFMVPRGIGSSLSTRVSNELGGHPRAA  
 RMAARVAIAMTVLVCLVLVIAMIFLRNVWGNAYSSEEEVVAYIASMLP  
 VLAVSFFIDGINGALSGVLTGCGKQ NIGAHVNLA AFYLVGIPTAVLLAFV  
 LHLNGEGLWLGLVCGSISKVGMLL FITLRTDWGKEAIMAKERVFSSSLP  
 TR

41 Os10g20390 MASTAAEVKRLRLLAGPLMAGFVLRNSVQMVSVMFVGHLLGELQLAGS  
SLAASLASVTGFSLLSGMSSALDTLCGQAYGAGQHRLLGVYAQRAMLV  
LAAAAPIALVWASAGEILLFGQDPAIAAEAGAYARWMIPSLAAYVPL  
ACALRFLQAQGIVPVMASGVAVAHVAVCWALVHKAGMGSKGAA  
LSGAVTYWTNFAVLAFYARLSGACKTTWTGFSMNAFRELRRFTELAVP  
SAMMVCLEWSSFEILVLLSGILPNPQLETAVLSISLSTASLLIMVPRGIGSS  
LRVRTPHMTPYIISDVTHQYFISPGSKGLSQCST

42 Os10g20450 MEKPAASVEEPLLVGAGEKKGESAAAAELKRLRLLAGPLVASGVLRNV  
VQMVSVMFVGHLLGELPLAGASLATSANVTGFSLLFGMASALDTLCGQ  
AYGARQHLLGVYKQRAMLVLAVAAVPIALVWASAGEILLFGQDPAI  
AAEAGAYARWLIPSLVPFVPLVCHIRFLQAQSAVLPVMASCGVTAASHV  
AVCWALVRKAGMGSRGAALANAVSYGVNLTIMSLYVRLSRSEKTTWT  
GFSMEAFRELRYAELAIPAAMMVCLEWWSFEFLVMLSGLLPNPKLETS  
VLSICLNTGALLVMVPIGLSTAISTRVWNELGAGNPQAAKLATRVVICM  
AMTEGSVVAFTMILLRNSWGHMYSDEAEVVTYIARMIPVLAIFFIDGM  
HSALSGVLTGCGKQKIGARVNLGAFYLAGIPMAVFLAFVLHNGMGLW  
LGIVCGSLSKLILLFWITMSINWEKESTRAKELVFSSSLPVA

43 Os10g20470 MAAAAVHEPLLAAPPTPGKAADGDGPEEGRRLASAEAKRLRLLAGPI  
VASCILQCVMVMVSVMFVGHLLGELPLAGASLATSANVTGYSLLTGMA  
TAMDTLCGQAYGARQYHLLGVYKQRAMVVLAAACVPIALVWASAGRI  
LLLLGQDAGIAAEAGAYARWMLPSLAAYVPLQCHIRFLQTQTVVLPVT  
ASSAATALLHPLVCWLLVFRAGMGSKGAALANAIYAVNLAILAVYVR  
ASNTCKGRWSGFSGEAFKELRQFAALAMPSAMMICLEWWSFEILVLLSG  
LLPNPQLETSVLSICLNTGALLYMVPLGLCSSISTRVSNEIGAGQPQAAKR  
ATRVVMYMALSEGLVISFTMFLLRNVWGYMYSNEQEVVTYIARMLPIL  
DISFFIDGLHSSLSGVLTGCGKQKIGAAVNLGAFYLVGIPVAVLLAFYLH  
LNGMGLWLIVCGSIIKLLVLIIVSCCIDWEKEAILAKDRVFSSSLPVA

44 Os10g37920 MCEALVDRQLLPPCGCNGGGDVVVVVVVPKTSAAPVLEDRPKTSAAAVS  
KGGEAASILRLSLPMIMTGLILYIRPMISMLFLGRLGELALAGGSLAIGFA  
NITGYSVLSGLAMGMEPVCQAVGAGNLPLVGATMQRMLVLLLVAVSV  
PVAFLWAWMEPLLLCGQDAIAAAAQRILFCLPDLFLSLLHPLRIYL  
RVQSINLPLTACAALAVA AHL PINHLLVSVLGLGIEGVALASAWANLN  
VIFLLAFVYVSGVHRDTGGFSLPRKMFKDVDGWVRLVRLAAESCASVC  
LEWWWYEIMILLCGLLANPRATVASMGIQTTSLLYIFPSSLSFGVSTRV  
SNELGANRPSAARAAARAGLALS AVQGLASLAFVSVRGAWARMFTPD  
ADILALTASVLPILGLCELGNCPQTTGCGVLRGSARPRDGAHINLGAFYG  
VGTPVAVGLAFWAGMDFRGLWGLLAAQAACVAVMLVVIQRTDWDV

QAKLAQVLGAAAASGGDHGVNEAGGNDAVAHVKVAAPHGDEDSSLLI  
TVST

45 Os11g03240 MERTTEDDERPTVPLLEPKPASNEEEEEVGSVRRRVVEENKKLWVVAGP  
SICARFSSFGVTVISQAFIGHIGATELAAYALVSTVLMRFSNGILLGMASA  
LETLCGQSYGAKQYHMLGVYLRQSWLVLFCCAVILLPVYIFTPLLIALG  
QDPEISAVAGTISLWYIPVMFSYIWAFLMLQMYLQAQSKNMIVTYLAFLN  
LGIHLFLSWLLTVKFKLGLAGVMGSMVISFWIPVFGQLAFVFFGGCPLT  
WTGFSSAFTDLGAIMKLSLSSGVMLCVELWYNTILVLLTGYMKNAEVA  
LDALSICLNINGWEMMISIGFLSAIGVRVANELGAGSARRAKFAIFNVVT  
TSFLIGFVLFVLFVFFRGLAYIFTESKAVADEVADLAPLLAFSILLNSVQP  
VLSGVAIGSGWQSVVAYVNVTSYYLIGIPLGAILGYVLGFQAKGIWIGM  
LLGTLVQTLVLLFITLRTNWKKQVEITRERLNRWYMDENGRSQNSIGNA

46 Os11g03484 MEKPGDDEKLTVPLLEPKPATYKHQEDDDAEDEEVGSVRRRVVEENKK  
LWVVAGPSICARFSSFGVTVISQAFIGHIGATELAAYALVSTVLMRFSNGI  
LIGMASALETLCGQSYGAKQYHMLGIYLRQSWIVLFCCAVILLPIYLFTT  
PLLIALGQDPDISVVAGTISLWYIPIMFSYVWGLTIQMYLQSQSKNMIVT  
YLSLLNFGLNFLSWLMVVKFHLGLAGVMGSMVIACWIPIFGQLAYVFF  
GGCPQTWTGFSSAFTDLGAIKLSISSGVMLCVELWYNTILVLLTGYMK  
NAEVALDALSICLNINGWEMMIAIGFLAATG

47 Os11g03500 MERPGDEHDDCRTVPLLEPKHAHGEESNNKQEEDEEEVGSIGRRVLVE  
SKKLWVVAGPSICARFSTFGVTVISQAFIGHVIGATELAGYALVSTVLMRF  
SGGILLGMASALETLCGQSYGAKQYHMLGIYLRQSWIVLLCCAVLLLP  
YLFTTPLLIFLGQDPKIAAMAGTISLWYIPVMISNVGNFTLQMYLQAQSK  
NMIVTYLAMLNLGLHLFLSWLLTVQFYLRGLAGVMGSMVLAFFVFFGGCPL  
TWTGFSFAAFTELGAIKLSLSSGVMLCVELWYNTILVLLTGYMKNAEI  
ALDALSICLNINGWEMMISIGFLSAKGVVRVANELGAGSARRAKFAIFNV  
VTTSFSIGFMLFVLFVIFRGRVYIFTESTVVADAVAELSPLLAFAFNLLNSI  
QPVLSGVAVGSWQSVVAYVNVTSYYLFGIPIGVILGYVLGFQVKGWI  
GMLLGTIVQTLVLLFITLRTDWEKQVEIARQLNRWSMDENGRQQNPG  
ENP



48 Os12g01580 MTATSPPMRSVAAAALVLTPTPTLNRLSFPFAHRHCPSTAAPRWRPARC  
 RGKPAVEDVVHDDEEETWRREANPERKDGGEEMLGRGWFVDEIGME  
 ILTIALPAVLALAADPITALIDTAFVGHVVGSTELAAVGVVSISIFNLVSKLLN  
 VPLLNVTTSFVAEQQAVDADYNSSVENSHIGEEISISQEKAGEQRKFLPA  
 VSTSLALAAGIGLMETVALILGSGTLLDIVGVPVDSMPMRIPAEQFLTLRAY  
 GAPPVIVALAAQGAFRGFMDTKTPLFAVVAGNLVNALLDAIFIFPLGLG  
 VSGAALATVTSEYLTAfillWKLNSKIVLFSWNIVSGDIIRYLKSGALLIA  
 RTIAVVLTFVSTSLAAREGSVPMAGYEICLQVWLTISLLNDALALAGQA  
 LLASEYAKGNYKKARIVLYRVLQIGGVTGAALSTLLLGFYLSMLFTD  
 DAAVLDVAQTGVWFVTVSQPINAVAFVMDGLYYGVSDFAFVAYSTLFA  
 GAISSAVLLVAAPKFGLGGVWAGLTLFMSLRAIAGFWRLGSKGGPWKII  
 WSETE

49 Os12g03200 MERTTEDDERLTDPLLEPKPAINGGGGGSNEEEEEVGS LGRR LVEENKK  
 LWVVAGPSICARATSF GATVVSQAFIGHIGATELAAYALVSTVLMRLSV  
 GILIGMASALETL CGQSYGAKQYHMLGIYLQRSWIVLFC CAVILLPIYLF T  
 TPLLI ALGQDPDISV VAGTISLWYIPIMFSYVWGLTIQMYLQSQSKNMIV T  
 YLSLLNFGLHLFLSWLMVVKFHLGLAGVMGSTVIACWIFI GQLAYVFF  
 GGCPQWTGFSSSAFTDLGAIKLSISSGVMLCVELWYNTILVLLTG YMK  
 NAEVALDALSIW

50 Os12g03230 MGSMVISFWIPVFGQLAFVFFGGCPLTWTGFSSSAFTDLGAIMKLSLSSG  
 VMLCLELWYNTILVLLTSYMKNAEVALDALSI CLNINGWEMMISIGFLS  
 AIGVRVANELGAGSARRAKFAIFNVVTT SFLIGFVLFVLF LFFRGLAYIF  
 TESKAVADEVADLAPLLAFSILLNSVQPVL SGVAIGSGWQSIVAYVNVTS  
 YYLIGIPLGAILGYVLGFQVKGIWIGMLL GTLVQTLVLLFITLR TDWKKQ  
 VEITRERLNRWYMDENGRSQNSIGNA

51 Os12g03260 MERPGDEHDDCRTAPLLEPKHAHGE GSNNDKQEEDEEEVGS LGPRVLV  
 ESKKLWVVAGPSICARFSTFGVTVISQAFIGHIGATELAGYALVSTVLMR  
 FSGGILLGMASALETL CGQSYGAKQYHMLGIYLQRSWIVLLCCAVLLLPI  
 YLFTTPLLIFLGQDPKIAAMAGTISLWYIPVMISNVGNFTLQMYLQAQSK  
 NMIVTYLAMLNLGLHLFLSWLLTVQFHLGLAGVMGSMVIA YWIPVFGQ  
 LAFVFFGGCPLTWTGFSSAAFTELGAI VKLSLSSGVMLCVELWYNTILVL  
 LTGYMKNAEIALDALSI CLNINGWEMMISIGFLSATGVRVANELGAGSA  
 RRAKFAIFNVVTT SFSIGFMLFVLF LIFRGLAYIFTESKVVADAVAELSP  
 LLAFSILLNSIQPVL SGVAVGSGWQSVVAYVNVTSYYLFGIPIGVILGYVL  
 GFQVKGIWIGMLL GTLVQTLVLLFITLR TDWEKQVEIARQLNRWSMDE

NGRQQNPGENP

- 52 Os12g36660 MEELKLMRRLCLPISALNLLHYVKSMVTVLCLGRLGRAELAGGALAVG  
LTNVTGYSVLSGLALGLEPLAGQAFSGTGRTSRPRRALRRAVLLLLA  
ASFPVAALWACAGPAARAARQDAAVARAAGSYCRYAIPDLAAASVLLP  
ARVYLRSKGETRRLASCAALAVALVHAPATAYLGARLRVPGVAMAAC  
MTSFATLAFLWISLTWAPAQNEPDEPADLEEWAGVGQWAEWADLLRLS  
LPSCLSVCLEWWYELMTIAAGYLDPHTALATAAIVIQTTSLLYTIPVT  
LSSAVSTRVANELGAGRPRSAQVSFVAMGIAMMGSCVGLTWTTFRGR  
LWVQVFTTDPTIQSLTTSVLPVIGLCELANCPQTTGCGVLRGSARPAVGA  
AINLYSFYLVGAPVALVLAFLDMGFLGLCLGLLSAQVKIVNL
- 53 Os12g42130 MAETSSARSPLLDVDESSGASELLRREPVPRSVLSRLAAWEAGNLWRIS  
WASILITLLSFTLSLVTQMFGHLGELELAGASITNIGIQGLAYGIMIGMA  
SAVQTVCGQAYGARKFRAMGIVCQRALVLQFATAIVIAFLYWYAGPFL  
RLIGQAADVAAAGQLYARGLVPQLLAFALFCPMQRFLQAQNIVNPVAYI  
TMAVLIFHILISWLTVFVLGFGLLGAALTSFSWWVLVALTWGLMVWT  
PACKETWTGLSVLAFRGLWGYAKLAFASAVMLALEIWWYVQGFVLLTGF  
LPDPEIALDLSICINYWNWDFQIMLGLSYAASIRVGNELGAGHPNVARF  
SVFVVITASVAFSILATILVVLRYPLSTLYTSSTTVIEAVIKLTPLLSISIFL  
NGIQPILSGVAVGSGWQVVVAYVNVGAYYLIGLPIGCVLGYKTSLGAA  
IWWGLIIGVSVQTVALLIITARTNWDNEVMKAIQRLRQTAVDDGTVPIVD  
DIE
- 54 AT4G29140 MCNPSTTTTTTGENQESRTGLFLDLFSINSFEPTKRNLRHCENRGSPLM  
AEAVTEAKSLFTLAFPIAVTALVLYLRSVSMFFLGQLGDLELAAGSLAI  
AFANITGYSVLSGLALGMEPLCSQAFGAHRFKLLSLTLHRTVVFLVCC  
VPISVLWFNVGKISVYLHQDPDIKLAQTYLIFSLPDLTNTLLHPIRIYLR  
AQGIIHPVTLASLSGAVFHLPANLFLVSYLRLGLTGAVAVASSITNIFVAVF  
LVCYVWASGLHAPTWTDPTRDCFRGWAPLLRLAGPSCVSVCLEWWY  
EIMIVLCGLLVNPRSTVAAMGVLIQTTSTFLYVFPSSLSFAVSTRVGNELG  
ANRPKTAKLTATVAIVFAAVTGIIAAAFAYSVRNAWGRIFTGDKEILQLT  
AAALPILGLCEIGNCPQTVGCGVVRGTARPSTAANVNLGAFYLVGMPVA  
VGLGFWAGIGFNGLWVGLLAAQISCAGLMMYVVGTTDWESEAKKAQT

LTCAETVENDIIKAVVASTIDGECDEAEPLIRITVLY

55 AT5G19700 METPNIISHTNLLSKIDLEKQNPAPIFPTITELKSEARSLFSLAFPTILAAALIL  
YARSAISMLFLGHIGELELAGGSLAIAFANITGYSVLAGLALGMDPLCSQ  
AFGAGRPKLLSLTLQRTVLFLLTSSVVIVALWLNLGKIMIYLHQDPSISSL  
AQTYILCSIPDLLTNSFLHPLRIYLRAQGITSPLTLATLAGTIFHIPMNFFLV  
SYLGWGFMGVSMAAAASNLLVVIFLVAHVWIAGLHQPTWTRPSSECFK  
DWGPVVTLAIPSCIGVCLEWWYEIMTVLCGLLIDPSTPVASMGILIQTT  
SLLYIFPSSLGLAVSTRVGNELGSNRPNKARLSAIVAVSFAGVMGLTASA  
FAWGVSDVWGWIFTNDVAIIKLTAALPILGLCELGNCPQTVGCGVVRG  
TARPSMAANINLGAFYLVGTPVAVGLTFWAAYGFCGLWVGLLAAQICC  
AAMMLYVVATTDWEKEAIRARKLCTEGVDVVITTTQTNGDLSEPLIYV  
VTVATD

56 AT1G58340 MCNSKPSSASSLLSCKDKTHISKLETCDTDNPHYSEFRDTSLDLKRWP  
SFLEGLEEVKAIGKISGPTAMTGLLMYSRAMISMLFLGYLGELELAGGSL  
SIGFANITGYSVISGLSMGMEPICQAYGAKQMKLLGLTLQRTVLLLLSC  
SVPISFSWLNMRILLWCGQDEEISSVAQQFLLFAIPDLFLLSLLHPLRIYL  
RTQNITLPVITYSTAVSVLLHVPLNYLLVVKLEMGVAGVAIAMVLTNLNL  
VVLLSSFVYFTSVHSDTWVPITIDSLKGWSALLSLAIPTCVSVCLEWWW  
YEFMILCGLLANPRATVASMGILIQTALVYVFPSSLSLGVSTRISNELG  
AKRPAKARVSMIISLFAIALGLMAMVFAVLVRHHWGRLFTTDAEILQL  
TSIALPIVGLCELGNCPQTTGCGVLRGCARPTLGANINLGSFYFVGMPVA  
ILFGFVFKQGFPLWFGLLAAQATCASMLLCALLRTDWKVQAERADEL  
TSQTPGKSPPLLPIASSKSRSTSGTEDMMRTMLV

57 AT4G23030 MAAPLLMIKNQTDHRQDPNPNPHLSSSIQEAKSIKISLPLILTGLLLYS  
RSMISMLFLGRLNDLSALSGGSLALGFANITGYSLLSGLSIGMEPICVQAF  
GAKRFKLLGLALQRTTLLLLLCSLPISILWLNKILLFFGQDEEISNQAEI  
FILFSLPDLILQSFLHPIRIYLRQSITLPLTYSAFFAVLLHIPINYLLVSSLGL  
GLKGVALGAIWTNVNLLGFLIYIVFSGVYQKTWGGFSMDCFKGWRS  
MKLAIPSCVSVCLEWWWYEIMILLCGLLLNPQATVASMGIQTTALIYI  
FPSSLSISVSTRVGNELGANQPKARIAARTGLSLSLGLGLLAMFFALMV  
RNCWARLFTDEEEIVKLTSMVLPPIGLCELGNCPQTTLCGVLRGSARPKL  
GANINLCCFYFVGMPVAVWLSFFSGFDFKGLWLGLFAAQGSCLISMLVV  
LARTDWEVEVHRAKELMTRSCDGEDDDGNTPFLLDSLIEENLVF

58 AT5G52050 MSQSNRVRDEVTLPLLQKTSHLKNHSSVLSVFLNEAISICKISYPLVLTGL  
FLYVRSFVLSFLGGLGDATLAGGSLAAAFANITGYSLFSGLTMGVESIC  
SQAFGARRYNYVCASVKGRIILLVTSPLVTLLWMNMEKILLILKQDKK  
LASEAHIFLLYSVPDLVAQSFLHPLRVYLRTQSKTLPISICTVIASFLHLPI  
TFFLVSYLGLGIKGIASGVVSNFNLVAFVFLYICFFEDKLSVNEDEKITEE  
TCEDSVREWKLLCLAIPSCISVCLEWWCYEIMILLCGFLDPKASVASM  
GILIQITSLVYIFPHSLSLGVSTRVGNELGSNQPKRARRAAIVGLGSLIALG  
FTAFAFTVSVRNTWAMFFTDKEIMKLTAMALPIVGLCELGNCPQTTCG  
GVLGRSARPKIGANINGVAFYAVGIPVGAVLAFWFGFGFKGLWGLMA  
AQITCVIGMMAATCRTDWELEAERAKVLTTAVDCGSSDDDAKEDMEA  
GMVDK

59 AT2G38510 MQVGEEMASLTKIACPIVMTSLLIFRSIISMWFLSHLGKVELAGGALAM  
GFGNITGVSVLKGLSVGMDPICGQAFGAKRWTVLSHTFQKMFCLLIVVS  
VPIAVTWLNIEPIFLRLGQDPDITKVAKTYMLFFVPELLAQAMLHPLRTF  
LRTQGLTSPLTISAIVSILLHPLFNIVFVVRMRLGVKGVAIAMAFNTMNI  
DVGLLVYTCFSDSLIKPWEGLALRSLFRGWWPLLSLAAPSAISVCLEYW  
WYEIMLFLCGLLGNPKASVAAMGILIQTTGILYVVPFAISSAIATRUGH  
LGGGQPTRAQCTTVIGLILAVAYGLAAAVFVTALRSVWGKMFTEPEIL  
GLISAALPILGLCEIGNSPQTAACGVLTGTARPKD GARVNLCAFYIVGLP  
VAVTTTTFGFKVGFRLWFGLLSAQMTCLVMMLYTLIRTDWSHQVKRA  
EELTSAAADKSHSEDETVHAEVQDDDDVSSNDLEIGLLQNTN

60 AT1G71870 MEDKIQSDDFTSHKNPTLPQVIEELKELWAMVLPITAMNCLVYVRAVVS  
VFLGRLGSLELAGGALSIGFTNITGYSVMVGLASGLEPVCSQAYGSKN  
WDLTSLHRMVVILLMASLPISLLWINLGPIMLFMGQNPEITATAAEYC  
LYALPDLLTNTLLQPLRVYLRVTKPMMWCTLA AVAFHVPLNYWL  
VMVKHWGVPGVAIASVVTNLMVVLLVGYVWVSGMLQKRVS GDGDG  
GSTTMVAVVAQSSVMELVGGGLPLMRVAVPSCLGICLEWWWYEIVIV  
MGGYLENPKLAVAATGILIQTTSLMYTVPMALAGCVSARVGNELGAGR  
PYKARLAANVALACAFVVGALNVAWTVILKERWAGLFTGYEPLKVLV  
ASVMPIVGLCELGNCPQTTGCGILRGTGRPAVGAHVNLGSFYFVGTPVA  
VGLAFWLKIGFSGLWFGLLSAQAACVVSILYAVLARTDWEGEAVKAMR  
LTSLEMRKVGQDEESSLLLLDDEKLG DVL

61 AT5G49130 MVVEEDSRLINLQHKYNPTMPEVVEELKRIWDISFPVAAMSILNYLKNM  
TSVVC MGRGLSLELAGGALAIGFTNITGYSVLSGLATGMEPLCGQAIGSK  
NPSLASLTLKRTIFLLLLASLPISLLWLNLA PLMLMLRQQHDITRVASLYC  
SFSLPDLLANSFLHPLRIYLRCKGTTWPLMWCTLVSVLLHLPITAFFTFYI  
SLGVPGVAVSSFLT NFISLSLLLCYIYLENNNNNDKTTSKSLCLDTPLMLYG  
SRDSGENDVWSTLVKFAVPSCIAVCLEWWWYEFMTVLAGYLPEPKVAL  
AAAAI VIQTTSLMYTIPTALSAAVSTRVSNELGAGRPEKAKTAATVAVG  
AAVAVSVFGLVGTTV GREAWGKVFTADKVLELTA AVIPVIGACELAN  
CPQTISCGILRGSARPGIGAKINFYAFYVVGAPVAVVLA FVWGLGFMGL  
CYGLLGAQLACAISILTVVYNTDWNKESLKAHDLVGKNVISPNVDQIIV  
KCEGLH

62 AT4G22790 MSETSKSESLDPEVSEGLCSKTLMQSIVHELKLQMRIGLPLVVMNLLWF  
GKM TTTSVFLGRQGELNLAGGSLGFSFANVTGFSVLYGISAAMEPICGQ  
AFGAKNFKLLHKTLMFMAVLLLLLVISVPISFLWLVNHKILTGFQREDISFI  
AKKYLLYLLPELPILSFLCPLKAYLSSQGVTL PIMFTTAAATSLHIPINVL  
SKARGIEGVAMAVWITDFIVVILLTGYVIVVERMKENKWKQGGWLNQS  
AQDWLTLIKLSGPCCLTVCLEWWCYEILVLLTGRLPNPVQAVSILII VFNF  
DYLLYAVMLSLGTCVATRVSNELGANNPKGAYRAAYTTLIVGIISGCIG  
ALVMIAFRGFWSLYTHHDQLILNGVKKMMLIMAVIEVVNFPLMVCGE  
IVRGTA KPSLGMYANLSGFYLLALPLGATLAFKAKQGLQGFLIGLFGVIS  
LCLSILLIFIARIDWEKEAGKAQILTCNTEDEQTSQSGQDSHS

63 AT1G33560 MASFIDLFAGDITTQLLKLLALVANTVYSCKGIAERLITMIRDVQPTIREI  
QYSGAELSNHHQTQLGVFYEILEKARKLCEKVLRCNRWNLKHVYHANK  
MKDLEKQISRFLNSQILLFVLAEVCHLRVNGDRIERNMDRLLTERNDSLS  
FPETMMEIETVSDPEIQTVLELGKKKVKEMMFKFTDTHLFGISGMSGSG  
KTTLAIELSKDDDVRLFKNKVFLFTVSRSPNFENLESCIREFLYDGVHQ  
RKLVLDDVWTRESLDRMLSKIRGSTTLVVSRSKLADPRTTYNVELLKK  
DEAMSLCLCAFEQKSPSPFNKYLVKQVVDECKGLPLSLKVLGASLKN  
KPERYWEGVVKRLLRGEAADETHESRVFAHMEESLENLDPKIRDCFLD  
MGAFPEDKKIPLDLLTSVWVERHDIDEETAFFSVLRLADKNLLTIVNNPR  
FGDVHIGYYDVFTQHDVLRDLALHMSNRVDVNRRELLMPKTEPVLP  
REWEKNKDEPFDAKIVSLHTGEMDEMNFDMDLPAEVLILNFSSDNY  
VLPPFIGKMSRLRVLVIINNGMSPARLHGFSIFANLAKLRSWLKR VHVP  
ELTSCITPLKNLHKIHLIFCKVKNFVQTSFDISKIFPSLSDLTIDHCDDLE  
LKSIFGITSLSLNSITNCPRIELPKNLSNVQSLERLRLYACPELISLPVEVC  
ELPCLKYVDISQCVSLVSLPEKFGKLSLEKIDMRECSLLGLPSSVAALVS  
LRHVICDEETSSMWEMVKKVPELCEVAKKCFVVDWLDD

64 AT3G08040 MTETGDDLATVKKPIFLVIFKDLRHVFSRDTTGREILGIAFPAALALAAD  
PIASLIDTAFVGRGAVQLAAVGVSAIFNQASRITIFPLVSLTTSFVAEED  
TMEKMKEEANKANLVHAETILVQDSLEKGISSPTSNDTNQPQPAPDT  
KNSNGNKSNNKEKRTIRTASTAMILGLILGLVQAIFLIFSSKLLLGVMGVK  
PNSPMLSPAHKYLSIRALGAPALLSLAMQGIFRGFKDTKTPLFATVVAD  
VINIVLDPFIFVLRGLIIGAAIAHVISQYFMTLILFVFLAKKVNLIPPNGD  
LQFGRFLKNGLLLLARTIAVTFQCQLAAAMAARLGTTMAAFQICLQVW  
LTSSLLNDGLAVAGQAILACSF AEKDYNKVTAVASRVLQMGFVLGLGL  
SVFVGLGLYFGAGVFSKDPAVIHLMAIGIPFIAATQPINSLAFVLDGVNFG  
ASDFAYTAYSMVGVA AISIAAVIYMAKTNGFIGIWIALTIIYMALRAITGIA  
R MATGTGPWRFLRGRSSSSSS

65 AT1G51340 MMSEGYNTDFPRNPLYIFFSDFRSVLKFDELGLEIARIALPAALALTADP  
IASLVDTAFIQIGPVELA AVGV SIALFNQVSRIAIFPLVSITTSFVAEEDAC  
SSQQD TVRDHKECIEIGINNPT EETIELIPEKHKDSL SDEFK TSSSIFSISKPP  
AKKR NIPSASSALIIGGVLGLFQAVFLISA AKPLLSFMGVKHDSPMMRPS  
QRYLSLRSLGAPAVLLSLAAQGVFRGFKDTTTPLFATVIGDVTNIILDPIFI  
FVFR LGVTGAATAHVISQYLMCGILLWKL MGQVDIFNMSTKHLQFCRF  
MKNGFLLL MRVIAVTFCVTLSASLAAREGSTSMAAFQVCLQVWLATSL  
LADGYAVAGQAILASAF AKKDYKRAAATASRVLQLGLVLGFVLAVILG  
AGLHFGARVFTKDDKVLHLISIGLPFVAGTQPINALAFVFDGVNFGASDF  
GYAAASLVMVAIVSILCLLFLSSTHGFIGLWFGLTIYMSLRAAVGFWRIG  
TGTGPWSFLRS

66 AT2G38330 MAAVATSFCSFPHRSPSRFGNPNSSIRRTIVCKSSPRDESPAVSTSSQRPEK  
 QQNPLTSQNKPDHDKPDPGIGKIGMEIMSIAPALALAADPITSLVDT  
 AFVGHIGSAELAAVGVSVSFVNLVSKLFNVPLLNVTTSFVAEEQAIAAK  
 DDNDSIETSKKVLPSVSTSLVLAAGVGIAEAIASLGSDFLMDVMAIPFDS  
 PMRIPAEQFLRLRAYGAPPVVVALAAQGAFRGFKDTTTPLYAVVAGNVL  
 NAVLDPILFVFLGFGISGAAAATVISEYLIAFILLWKLNENVVLLSPQIKVG  
 RANQYLKSGLLIGRTVALLVPFTLATSLLAAQNGPTQMAGHQIVLEIWL  
 AVSLLTDALAIAAQSLLATTYSQGEYKQAREVLFVGLVQVGLATGTGLAA  
 VLFITFEPFSSLFTTDSEVLKIALSGTLFVAGSQPVNALAFVLDGLYYGVS  
 DFGFAAYSMMVIVGFISLFLVAAPTFLAGIWTGLFLFMALRLVAGAW  
 RLGTRTGPWKMLWSAPEKPE

67 AT4G39030 MLIKSQRLTLFSPLLSKTRRIPVNSHQTLVAESVITRRTLGAITATPSFHKN  
 PVVIRRRIKLERVTRNCVRIDREIDEEEEEEKERGDLVKQSIWEQMKEIV  
 KFTGPAMGMWICGPLMSLIDTVVIGQGSSIELAALGPGTVLCDHMSYVF  
 MFLSVATSNMVATSLAKQDKKEAQHQISVLLFIGLVCGLMMLLLTRLFG  
 PWAVTAFTRGKNIEIVPAANKYIQIRGLAWPFILVGLVAQSASLGMKNS  
 WGPKALAAATIINGLDLCLFLGQGIAGAAWATTASQIVSAYMMM  
 DSLNKEGYNAYSFAIPSPQELWKISALAAPVFISIFSKIAFYSFIIYCATSM  
 GTHVLAHQVMAQTYRMCNVWGEPLSQTQSFMPPEMLYGANRNLPK  
 ARTLLKSLMIIGATLGLVLGVIGTAVPGLFPGVYTHDKVIISEMHRLLIPF  
 FMALSALPMTVSLEGTLLAGRDLKFVSSVMSSSFIIGCLTLMFVTRSGYG  
 LLGCWFVLVGFQWGRFGLYLRRLLSPGGILNSDGPSPYTVVEKIKSI

68 AT2G21340 MQIQCKTLTFTVSSIPCNPKLPFPSSLTLRSWNPSFSPFRSSAVSGPKSSLK  
 LNRFLRNCASNQELVVDGETGNNGSISELQGDAANGSISPVVEAEVEEV  
 KVDDLATQSIWGMKEIVMFTGPAAGLWLCGPLMSLIDTAVIGQGSSE  
 LAALGPATVICDYLCYTFMFLSVATSNLVATSLARQDKDEVQHQSILLFI  
 GLACGVMMVLTRLFGSWALTAFTGVKNADIVPAANKYVQIRGLAWP  
 AVLIGWVAQSASLGMKDSWGPKALAVASAINGVGDVVLCTFLGYGIA  
 GAAWATMVSQVVAAYMMMDALNKKGYSAFSCVPSPELLTIFGLAAP  
 VFITMMSKVLFYTLLVYFATSMGTNIIAAHQVMLQIYTMSTVWGEPLSQ  
 TAQSFPELLFGINRNLPKARVLLKSLVIIGATLGIVVGTIGTAVPWLFP  
 IFTRDKVVTSEMHKVIIPYFLALSITPSTHSLEGTLLAGRDLRYISLSMTGC  
 LAVAGLLLMLLSNGGFGLRGCWYALVGFQWARFSLSLFRLLSRDGVLY  
 SEDTSRYAEKVKAA

69 AT5G65380 MRGGDGEEGSESRVALLKSPHTAEEDGEGLKDRILVETKKLWQIVGPAI  
FSRVTTYSMMLVITQAFAGHLGDLELAAISIVNNVTVGFNFGLLLGMASAL  
ETLCGQAFGAKKYHMLGVYMQRSWIVLFFCCVLLLPTYIFTTPVLKFLG  
QPDDIAELSGVVAIWVPLHFAFTLSFPLQRFLQCQLKNRVTAYAAVAAL  
VVHILVCWLFVDGLKLGVVGTVATISISWWWVNVLLLVYSTCGGCPLTW  
TGLSSEALTGLWEFLKLSASSGVMLCLENWYYRILIMTGNLQNARIAVD  
SLSICMAINGWEMMIPLAFFAGTGVRVANELGAGNGK GARFATIVSVTQ  
SLIIGLFFWVLMILLHNQIAWIFSSSVAVLDAVNKLSLLLAFTVLLNSVQP  
VLSGVAVGSGWQSYVAYINLGCYYCIGVPLGFLMGWGFKLGVMGIWG  
GMIFGGTAVQTMILSFITMRCDWEKEAQKASARINKWSNTIK

70 AT5G10420 MDKKSOGTKAIEEATVPLLECHNAAEEGGGMKREIWIETKKIWIYIVGPSI  
FTGLATYSILITQAFAGHLGDLELAAISIINNFTLGFNYGLLLGMASALET  
LCGQAFGAREYYMLGVYMQRYWILFLCCILLPLMYLFATPILKFIGQSD  
DIAELTG TIALWVIPVHF AFAFFFPLNRFLQCQLKNKVIAISAGVSLAVHI  
LVCWFFVYGYKLGII GTMASVNPWWLNIFILFLYSTRGGCTLTWTGFS  
SEAFTGLLELTKLSASSGIML CLENWYKILMLMTGNLVNAKIAVDSL SI  
CMSVNGWEMMIPLAFFAGTGVRVANELGAGNGK GARFATIVSITLSLMI  
GLFFT VII VIFHDQIGSIFSSSEAVLNAVDNLSVLLAFTVLLNSVQPVL SGV  
AVGSGWQSYVAYINLGCYYLIGLPFGLTMGWIFKFGVKGIWAGMIFGG  
TAIQT LILIIITTRCDWDNEAHKSSVRIKKWLVS DAGN

71 AT5G44050 MGERDDEAEGILEKAKIPLLDQNV AEEENGEIKKEIWLETKKLWRIVG  
PAIFTRVTTNLIFVITQAFAGHLGELELAAISIVNNVIIGFNYSLFIGMATAL  
ETLCGQAFGAKKYDMFGVYLQRSWIVLFLFSILLPLMYIFATPILKFMGQ  
PDDIAELSGIISVWAIPTHFSFAFFPINRFLQCQLKNSVIAISSGVSLVVHIF  
VCWLFVYVLELGVIGTIATANVSWWLN VFILFTYTTCCGGCPLTWTGFSM  
ESFTRLWEFTKLSASSGIMV CLENWYYRMLIVMTGNLEDARIDVDSMSI  
CMSINGLEMMVPLAFFAGTSVRVANELGAGNGKRARFAMIISVTQSLIG  
IISVLIYFLLDQIGWMFSSSETVLKAVNNLSILLSFAILLNSVQPVL SGVA  
VGSGWQSLVAFINLGCYYFIGLPLGIVMGWMFKFGVKGIWAGMIFGGT  
MVQTLILIFITMRCDWEKEAQNAKVRVNKWSVSDARK



72 AT1G33100 MAGRGGELTEALVKKTGREEEDELGMKEK VWIESKKLWVVAAPAFTR  
YSTFGVSMVTQAFIHLGPTLAAYSITFTILLRFSNGILLGMAGALGTLC  
GQAYGAKQYQMLGIYLQRSWIVLTGGTICLMPVFIFAGPILLALGQEERI  
VRVARVLALWVIGINFSFVPSFTCQMFLQAQSKNKIISYVTA VSLGLHVF  
FSWLLVAHFNFGITGAMTSMIAFWLPIIVQLLYVTCGGCKDTWRGFSM  
LAFKDLWPVLKLSLSSGGMLCLELWYNSVLVLLTGNLKNAEVALDALA  
ICISINALEMMIALGFLAAVSVRVSNELGSGNPKGAKFATLIAVFTSLSIGI  
VLFFVFLFLRGRISYIFTTSEAVAAEVADLSPLLAFSILLNSVQPVLSGVAI  
GAGWQGYVAYVNLACYL VGIPGVILGYVVGLQVKG VVWIGMLFGIFV  
QTCVLTVMTLRTDWDQVSTSLRNINRWVVPESRDANQISSEE

73 AT1G33110 MAGGGELTAALLKKAENGGEKDELGLKQKVWIESKKLWIVAAPAI  
FTRFSTFGVSIISQSFIGHLGPIELAAYSITFTVLLRFSNGILLGMASALETL  
CGQAYGAKQNHMLGIYLQRSWIVLTGCTICLTPVYIFSGPILLALGQEERI  
VRVARIIALWVIGINFSFVPSFTCQMFLQAQSKNKIIAYVAAVSLGVHVFL  
SWLLMVHFNFGITGAMTSTLVAFWLPNIAQLLFVTCGGCKDTWRGFSM  
MAFKDLWPVFKLSMSSGGMLCLELWYNSILVLLTGNLKNAEVALDALA  
ICLNINGLEMMIALGFLAAASVRVSNELGSGNPKGAKFATLTAVFTSLSL  
GIVLFFVFLFLRGRVSYIFTTSEAVAAEVADLSPLLAFSILMNSVQPVLSG  
VAVGAGWQGYVTYVNLACYL VGIPGIIILGYVVGLQVKG VVWIGMLFG  
IFVQTCVLTVMTLRTDWDQVSTSLRRLNRWVVPESRDVNQVSSEE

74 AT1G33900 MAGLEDTTDLRLPSASEPIKNIVLVGRTGNGKSATGNSLIGKQVFRSETR  
ATGVTMKCETCVAVTPCGTGINVIDTPGLFDLSVSAEYLSQEIIINCLVLA  
EDGLHAVVLVLSVRTRISQEEEA TLNLTQVIFGSQIIDYLVVLF TGGDELE  
ANNMTLDDYLSKGCPEFLKTVLR LCGGRRILFDNRTTDEGKKVKQVQE  
LLAHVAAIEKSTSGIPFTDEMHRKIQKEAETLREQQKEVESKD LAAAIE  
KWKKHYQTEHDKNMNMMAEMLGNRLREDSERQEKMLLALRDNLEIS  
QRQKNLNE LDNEPDLIHCGVSLRRMPCNML

75 AT1G33080 MARREGEVTETLLKKSTENRGEDRDGLGMKEK VWRESKKLWV VAGPA  
IFTRFSTGLSLISQAFIHLGSTE LAAYSITLTVLLRFSNGILLGMASALET  
LCGQAYGAKQYHMLGIYLQRSWIVLTGCTICLMPYIFAGPILLALGQEE  
RLVRVARIIALWVIGINISFVPSFTCQMFLQAQSKNKIIAYVAAVSLGVHV  
FLSWLLVVHFD FGIAGAMTSSLVAHWLPNIAQVLFVTCGGCTETWRGFS  
WLAFKDLWPVFKLSVSSGGMICLELWYNSILILLTGNLKNAEVALNALA  
ICININALEMMVAFGFMAAASVRVSNEIGSGNSNGAKFATM VVVSTLSI  
GIIFFFIFLFLRERSYIFTTSEAVATQVADLSPLLAFSILLNSIQPVLSGVA  
VGAGWQKYVTVNLACYL VGIPSGLFLGYVVGLQVKG VVWLG MIFGIF

VQTCVLTVMTRTDWDQVSSSLKRLNRWVEPESPRNQTLQNE

- 76 AT5G17700 MSGGGGEMEERLLNGSETEQRRESLYLRKKIWSEVRKMWRIALPSTLFR  
VMSFGCVVVAQAFIGHSSSETGLAAYALLQSTFIRFIYGIMAGMSSATETL  
CGQAYGAEQYHMMGIYLQRSWIVDTFIATLFPFIVLAGPILRLLGQNV  
VISETVDEIYPWVIPYLYSIVFTMTMQMYLQAQMKNAIIGILSTLALVLDI  
AATWWCVSVMGMGIHGALLGLNISSWSVAIAEFVYVFGGWCPHTWTG  
FSTAAFLDLIPMLKLSISSGFMLCLEYWYMSIIVLMSGYAKDANIAISAFSI  
CQYIYSWEMNICFGLMGAACVRVANELGKGDADAVRFSIKVVLVVS AV  
IGVICSALCLAFGGQISYLFSDSQAVSDAVADLSIVLSISILFNIIQPILSGVA  
IGAGMQSMVALVNLASYAIGVPLGVLLVYVFNFGIKGLWSGMLAGVG  
IQTILCYVIYKTDWELEVKKTNERMKTWTLNLPVQSTTISTRDEERK
- 77 AT3G03620 MSTQEEMEERLLREGSDAEGQSNNRESIYLRTKVVSEVNKMWRIALPSS  
LFRMTSFGSIIVAQAFIGHSSSELGLAAYALLQSTFIRFLYGLMGGMSSATE  
TLCGQAYGAEQYHTMGIYLQRSWIVDMAVTTLFPLPFIVLAGPILRLLGQ  
NVEITKTVDEIYPWMIPYVYSLIFTMTIQMYLQAQMRNAIVGVLSLSTLSLA  
LDLVVTWWCVSVMGMGIGGALLGLNVGSWAMVLAEFVYIFGGWCPFT  
WTGFSIAAFVDLIPMLKLSISSGFMICLEYWYMSILVLMAGYTKDAKIAIS  
AFSICQYIYTWELNICLGLGAACVRVANELGKGDAAHAVRFSIKVILTIST  
LMGVIFSALCLAFCGRISYLFNSDEVS DAVNDLSVILAVSILLNSIQPILS  
GVAVGAGMQSIVAVVNLASYAIGIPLGLILTYVFLGVKGLWSGMLA  
GIAIQTIILCYIYKTDWELEVKRTCERMKVWSLKPSNEESNPIIREESRSK
- 78 AT5G38030 MEEDKILTETLLSAAEPPALPFSSVEDIPPITTVGGFVKEFNVEVKLWY  
LAGPAIFMSITQYSLGAATQVFAGHISTIALAAVSVENSVIAGFSFGVMLG  
MGSALLETLCGQAFGAGKLSMLGVYLQRSWVILNVTAVILSLLYIFAAPIL  
AFIQTPAISSATGIFSIYMIPQIFAYAVNYPTAKFLQSQSKIMVMAAISAV  
ALVLHVLLTWFVIEGLQWG TAGLAVVNLASWWFIVVAQLVYIFSGTCG  
EAWSGFSWEAFHNLWSFVRLSLASAVMLCLEVWYLMAVILFAGYLKN  
AEISVAALSICMNILGWTAMIAIGMNAAVSVRVSNELGAKHPRTAKFSL  
LVAVITSTVIGLAISIALLIFRDKYPSLFGDEEVIIIVKDLTPILAVSIVINN  
VQPVLSGVAVGAGWQAVVAYVNIVCYVFGIPFGLLLGYKLNFGVMGI  
WCGMLTGTVVQTIVLTWMICRTNWDTEAAMAEGRIREWGGEVSDQLL

N

79 AT3G26590 MAKDKDITETLLTAAEERSDLPFLSVDDIPPITTVGGFVREFNVETKKLW  
YLAGPAIFTSVNQYSLGAITQVFAGHISTIALAAVSVENSVVAGFSFGIML  
GMGSALETLCGQAFGAGKLSMLGVYLQRSWVILNVTALILSLLYIFAAPI  
LASIGQTAAISSAAGIFSIYMIPQIFAYAINFPTAKFLQSQSKIMVMAVISA  
VALVIHVPLTWVIVKLQWGMPLAVVLNASWCFIDMAQLVYIFSGTC  
GEAWSGFSWEAFHNLWSFVRLSLASAVMLCLEVWYFMAILFAGYLKN  
AEISVAALSICMNILGWTAMIAIGMNTAVSVRVSNELGANHPRTAKFSSL  
VAVITSTLIGFIVSMILLIFRDQYPSLVKDEKVILVKELTPILALSIVINNV  
QPVLGVAVGAGWQAVVAYVNIACYYVFGIPFGLLLGYKLNYGVMGI  
WCGMLTGTVVQTIVLTMICKTNWDTEASMAEDRIREWGGEVSEIKQL  
IN

80 AT1G12950 MEKDNDFKDPFLASTEELDPATQKALMEYLGVGRASSLVSFSSTAV  
DIPPISGVGDFVREFRIESRKLWKLGAIFTTMSQYSLGAVTQVFAGHIS  
TLALAAVSIENSVIAGFSFGIMLGMGSALETLCGQAFGAGKVSMLGVYL  
QRSWVILSVTALFLSLIYIFAAPILTFIGQTAAISAMAGIFSIYMIPQIFAYAI  
NFPTAKFLQSQSKIMVMAGISGVVLVIHSFFTWLVM SRLHWGLPGLALV  
LNTSWVIVVAQLVYIFNCTCGEAWSGFTWEAFHNLWGFVKLSLASAA  
MLCLEIWYFMALVLFAGYLKNAEVSVAALSICMNILGWAAMVAFGTN  
AAVSVRVSNELGASHPRTAKFSLVVAVILSTAIGMFIAAGLLFFRNEYPV  
LFVEDEEVRNVVRELTPMLAFCIVINNVQPVLGVAVGAGWQAVVAYV  
NIACYLFGVFPFGLLLGFKLEYGVMGIWWGMVTGTTFVQSIVLTMICK  
TNWEKEASMAEERIKEWGGVPAEKETLLN

81 AT1G23300 METLNVDHEDTISSEQEHRHTKSDTDMPPISGGRDFIRQFAAESKKLW  
WLAGPAIFTSFCQYSLGAVTQILAGHVNTLALAAVSIQNSVISGFSVGIM  
LGMGSALATLCGQAYGAGQLEMMGIYLQRSWIILNSCALLLCLFYVFAT  
PLLSLLGQSPEISKAAGKFSLWMIPQLFAYAVNFATAKFLQAQSKVIAMA  
VIAATVLLQHTLLSWLLMLKLRWGMAGGAVVLNMSWWLIDVTQIVYI  
CGSSGRAWSGLSWMAFKNLRGFARLSLASAVMVCLEVWYFMALILF  
AGYLKNPQVSVAALSICMNILGWPIMVAFGFNAAVSVRESNELGAEHPR  
RAKFLIVAMITSVSIQIVISVTLIVLRDKYPAMFSDDEEVRVLVKQLTPL  
LALTIVINNIQPVLSGVAVGAGWQGIVAYVNIGCYLFCGIPIGLVLGYKM  
ELGVKGIWTGMLTGTVVQTSVLLFIIYRTNWKKEASLAEARIKKWGDQS  
NKREEIDLCEEDENNSNGENHRK

82 AT1G47530 MGKDKTLPLLDPREPELTGTKSASKVWAKEFGEESKRLWELAGPAIFT  
AISQYSLGALTQTFSGRLGELELAAVSVENSVISGLAFGVMLGMGSALET  
LCGQAYGAGQIRMMGIYMQRSWVILFTTALFLLPVYIWAPPILSFFGEAP  
HISKAAGKFALWMIPQLFAYAANFPIQKFLQSQRKVLVMAWISGVVLVI  
HAVFSWLFILYFKWGLVGAAILNTSWWLIVIGQLLYILITKSDGAWTGF  
SMLAFRDLYGFVKLSLASALMLCLEFWYLMVLVVVTGLLPNPLIPVDI  
SICMNIEGWTAMISIGFNAAISVRVSNELGAGNAALAKFSVIVVITSTLIG  
IVCMIVVLATKDSFPYLFTSSEAVA AETTRIAVLLGFTVLLNSLQPVLSGV  
AVGAGWQALVAYVNIACYIIGLPAGLVLGFTLDLGVQGIWGMVAGI  
CLQTLILIGIIFTNWNKEAEQAESRVQRWGGTAQE

83 AT4G25640 MDPTAPLLTHGGEVEEDYAPARSWTDVKRVLSTESAKLWMIAAPVGFN  
IICQYGVSSVTNIFVGHIGEVELSAVSISLSVIGTFSFGFLLGMGSALETLC  
GQAYGAGQVNMLGVYMQRSWIILFVSCFFLLPIYIFATPVLRLLGQAEEI  
AVPAGQFTLLTIPQLFSLAFNFPTSKFLQAQSKVVAIAWIGFVALSLHVIM  
LWLFIIIEFGWGTNGAALAFNITNWGTAAQIVYVIGWCNEGWTGLSWLA  
FKEIWAFFVRLSIASAVMLCLEIWMMSIIVLTGRLDNAVIAVDSLICMNI  
NGLEAMLFIGINAAISVRVSNELGLGRPRAAKYSVYVTVFQSLIGLVFM  
VAIIIARDHFIIFTSSKVLQRAVSKLAYLLGITMVLNSVQPVVSGVAVGG  
GWQGLVAYINLGCYIIFGLPFGYLLGYIANFGVMGLWSGMIAGTALQT  
LLLIVLYKTNWNKEVEETMERMKKWGGSETTSKDILASGWPSGLRRQ  
TQVLVFRGRGFKPHF

84 AT4G00350 MEIPVREERRSSSSSAGPLQQTISLAADDAIDSGPSSPLVVKVSVFETEHE  
TTKLIHAPSTLLGETTGDADFPPIQSFDAKLVCVVVETSKLWEIAAPIAFNI  
LCNYGVNSFTSIFVGHIGDLELSAVAIALSVVSNFSFGFLLGMASALETLC  
GQAFGAGQMDMLGVYMQRSWLILLGTSVCLLPLYIYATPLLILLGQEPEI  
AEISGKFTTQIIPQMFALAINFPTQKFLQSQSKVGIMAWIGFFALTLHIFIL  
YLFINVKWGLNGAAAADFVSAWGIAIAQVVYVVGWCKDGWKGLSW  
LAFQDVWPFLKLSFASAVMLCLEIWYFMTIIVLTGHLEDPVIAVGSLSIC  
MNINGWEGMLFIGINA AISVRVSNELGSGHPRAAKYSVIVTVIESLVIGV  
VCAIVILTRDDFAVIFTESEEMRKAVADLAYLLGITMILNSLQPVISGVA  
VGGGWQAPVAYINLFCYYAFGLPLGFLGKYKTSLGVQGIWIGMICGTSL  
QTLILLYMIYITNWNKEVEQASERMKQWGAGYEKLEKIAT

85 AT1G61890 MNSELENLHRPLIESSKSFVDYRLETVLTDRPELRYFRRIYLAMMIEMKF  
LFHLAAPAIFVYVINNGMSILTRIFAGHVGSFELAAASLGNSGFNMFTYQ  
LLGMGSAVETLCGQAHAHRYEMLGVYLQRSTVVLITCLPMSFLFLF  
SNPILTALGEPEQVATLASVFVYGMIPVIFAYAVNFPIQKFLQSQSIVTPSA  
YISAATLVIHLILSWIAVYRLGYGLLALSLIHSFSWWIIVVAQIVYIKMSPR  
CRRTWEGFSWKAFEGLDWDFRLSAASAVMLCLESWYSQILVLLAGLLK  
NPELALDSLAICMSIS AISFMVSVGFNAAASVRVSNELGAGNPRAAAFST  
VVTGVSFLLSVFEAIVVLSWRHVISYAFTDSPA VAEAVADLSPFLAITIV  
LNGIQPVLSGVAVGCGWQAFVAYVNIGCYVYVVGIPVGFVLGFTYDMGA  
KGIWTGMIGGTLMQTIILVIVTLRTDWDKEVEKASSRLDQWEESREPLL  
KQ

86 AT1G11670 MGSEATTAVNNLQQPLESTKSEADFRMESVLTDTHLSYFRRIYLASLIE  
MKYLFHLAAPAIFVYVINNGMSMLTRIFAGRLGSMQLAAASLGNSGFN  
MFTLGLMLGMGSAVETLCGQAHAHRYDMLGVYLQRSTIVLVITGLPM  
TLLFIFSKPLLISLGEADV ASVASVFVYGMIPMIFAYAVNFPIQKFLQSQS  
IVTPSAYISAATLVIHLILSWLSVFKFGWLLGLSVVHLSLWWIIVLAQIY  
IKISPRCRRTWDGFSWKAFDGLWDFQLSAASAVMLCLESWYSQILVLL  
AGLLKDPELALDSLAICMSISAMSFMVSVGFNAAASVRVSNELGAGNPR  
SAAFSTAVTTGVSFLLSLFEAIVLSWRHVISYIFTDSPA VAEAVAEVLSPL  
AITIVLNGVQPVLSGVAVGCGWQAYVAYVNIGCYVYVVGIPVGFVLGFTY  
DMGARGIWTGMIGGTLMQTIILVIVTFRTDWDKEVEKASSRLDQWEDT  
SPLLKQ

87 AT4G21910 MEVPSETTNLADLRRPLVVPVVSERKPPADVGLGLESVLTERRSLPYRRR  
VYLGACIEMKLLFRLALPAILVYLVNSGMGISARIFAGHLGKNELAAASI  
GNSCFSLVYGLMLGMGSAVETLCGQAYGAHRYEMLGIYLQRATIVLAL  
VGLPMTLLYTFSYPILILLGEPKTVSYMGSKYIAGLIPQIFAYAVNFTAQK  
FLQAQSVVAPSAFISAAALILQILLTWITVYVMDMGFMGIAYVLTISWW  
VIVGSQCFYIAVSPKFRHTWTGLSWRSLQGLWSFFKLSAGSAVMICLEM  
WYSQILVLLAGLLENPARSLDLSICMSISALSFMVSVGFNAAVSVRTSN  
ELGAGNPKSAWFSTWTATFVSFVISVTEALAVIWFDRDYVSYIFTEDADV  
AKAVSDLCPFLLAITIILNGIQPVLSGVAVGCGWQTYVAYVNVGCYYVVG  
IPVGCILGFTFDFQAKGIWTGMIGGTLMQTLILLYVTYRTDWDKEVMLH  
EIKWKKRGNVWICGTTRRSLSKTSYNKFGGVIDNKEKEISVVCAGDFNV  
RSFSWLLCLFYGNRTIKIYFCLMDYSLFTKSCS

88 AT3G21690 MDSSPNDGVHQPLLHPQSPSPPESTNGELETVLSDVETPLFLRLRKATII  
ESKLLFNLAAPAVIVYMINYLMSMSTQIFSGHLGNLELAAASLGNBTGIQV  
FAYGLMLGMGSAVETLCGQAYGGRKYEMLGVYLQRSTVLLTLTGLLLT  
LIYVFSEPIILLFLGESPAIASAASLFVYGLIPQIFAYAANFPIQKFLQSQSIV  
APSAYISTATLHVHLLLSWLAVYKLGMLLGLASLVLSLWWIIVVAQFV  
YIVTSECRETWRGFSVQAFSGLWSFFKLSAASAVMLCLETWYFQILVL  
LAGLLENPELALDLSICMTISGWVFMISVGFNAAISVRVSNELGAGNPK  
SAAFSVIIVNIYSLITCVILAVILACRDVLSYAFTEGKEVSDAVSDLCPLL  
AVTLVLNGIQPVLSGVAVGCGWQTFVAKVNVGCYYIIGIPLGALFGFYF  
NFGAKGIWTGMIGGTVIQTFILAWVTFRDWTKEVEEASKRLDKWSNK  
KQEVVPE

89 AT3G59030 MSSTETYEPLLTRLHSDSQITERSSPEIEEFLRRRGSTVTPRWLKLAVW  
ESKLLWTLGASIVVSVLNYMLSFVTVMFTGHLGSLQLAGASIATVGIQ  
GLAYGIMLGMAVAVQTVCGQAYGARQYSSMGIICQRAMVLHLAAAVF  
LTFLYWYSGPILKTMGQSVIAAHEGQIFARGMIPQIYAFALACPMQRFLQ  
AQNIVNPLAYMSLGVFLLHTLLTWLVTVNVLDFGLLGAALILSFSWLLV  
AVNGMYILMSPNCKETWTGFSTRAFRGIWPFYFKLTVASAVMLCLEIWIY  
NQGLVIISGLLSNPTISLDAISICMYLWDMQFMLGLSAAISVRVSNELG  
AGNPRVAMLSVVVVNITTVLISSVLCVIVLVFRVGLSKAFTSDAEVIAAV  
SDLFPLLAVSIFLNGIQPILSGVAIGSGWQAVVAYVNLVTTYVIGLPIGCV  
LGFKTSLGVAGIWWGMIAGVILQTLTLIVLTLKTNWTSEVENAAQRVKT  
SATENQEMANAGV

90 AT3G23560 MADPATSSPLDDHVGGEDERGRRSRSSTLVQKVIDVEEAKAQMIYSLP  
MILTNVFIYCIPIITSVMFASHLGQLELAGATLANSWATVSGFAFMVGLS  
GSLETLCGQGFQAKRYRMLGVHLQSSCIVSLVFSILITIFWFFTESIFGLLR  
QDPSISKQAALYMKYQAPGLLAYGFLQNILRFCQTQSIIAPLVIFSFPVPLVI  
NIATAYVLVYVAGLGFIGAPIATSISLWIAFLSLGTYVMCSEKFKETWTG  
FSLESFRYIVINLTLSLPSAAMVCLEYWAFEILVFLAGVMPNPEINTSLVAI  
CVNTEAISYMLTYGLSAAASTRVSNELGAGNVKGAKKATSVSVKLSLV  
LALGVVIVLLVGHGWWGLFSDSYVIKEEFASLRFFLAASITLDSIQGVLS  
GVARGCGWQRLVTVINLATFYLIGMPIAAFCGFKLKFYAKGLWIGLICGI  
FCQSSSLLLMTIFRKWTKLNVATV

91 AT3G23550 MADPTSDDHDGEGGRDKSSTFVQKLIDVEEAKTQIIYSLPMIFTNLFYI  
CIPLTSVMFASQLGQLELAGATLANSWATVTGFAFMTGLSGALETLCGQ  
GFGAKSYRMLGIHLQSSCIVSLVFTILITILWFFTESVFLLLRQDPSISKQA  
ALYMKYLAPGLLAYGFLQNILRFCQTQCIVTPLVLFSLPLVINIGTTYAL  
VHLAGLGFIGAPIATSISLWIAFVSLGFYVICSDKFKETWTGFSMESFHHV  
VLNLTLSIPSAAMVCLEYWAFEILVFLAGLMRNPEITTSVAICVNTEIS  
YMLTCGLSAATSTRVSNELGAGNVKGAKKATSVSVKLSLVLALGVVIAI  
LVGHDAWVGLFNSHVKEGFASLRFFLAASITLDSIQGVLSGVARGCG  
WQRLATVINLGTFFYLIGMPISVLCGFKLKLHAKGLWIGLICGMFCQSASL  
LLMTIFRKWTKLTAATV

92 AT2G04070 MEEPFLPQDEQIVPCKATWKSGQLNVELKKVSRLAVPMATVTIAQYLLP  
VISVMVAGHNGELQLSGVALATSFTNVSGFSIMFGLVGSLETLSGQAYG  
AKQYEKMGTYTYSAISSNIPICVLISILWIYMEKLLISLGQDPDISRVAGSY  
ALRLIPTLFAHAIVLPLTRFLLAQGLVPLLYFALTLLFHIAVCWTLVSA  
LGLGSNGAALAVISFWFFAMTLSCYVRFSSSCEKTRRFVSQDFLSSVKQ  
FFRYGVPSAAMLCEWWLFELLILCSGLLQNPKLETSVLSICLTTATLHY  
VIPVGVAADVSTRVSNKLGAGIPQVARVSVLAGLCLWLVESSFFSILLFA  
FRNIIGYAFSNSKEVVDYVADLSPLLCLSFVLDGFTAFLNGVARGCGWQ  
HIGALNNVVAYYLVGAPVGIYLAFCSELNGKGLWCGVVVGSVAQAIIIA  
IVTASMNWKEQAKKARKRLISENGLA

93 AT2G04050 MEEPFLQDEHLVPCKDTWKSQVTVLKKVSSLAAPMAAVTIAQYLL  
PVISVMVAGHNGELQLSGVALATSFTNVSGFSILFGLAGALETLCGQAY  
GAKQYEKIGTYTYSATASNIPICVLISVLWIYIEKLLISLGQDPDISRVAGS  
YALWLIPALFAHAFFIPLTRFLLAQGLVLPLLYCTLTLLFHIPVCWAFVY  
AFGLGSNGAAMAISVSFWFYVVILSCYVRYSSCDKTRVVFVSSDFVSCIK  
QFFHFGVPSAAMVCLEWWLFELLILCSGLLPNPKLETSVLSICLT TASLH  
YVIPGGVAAA VSTRVSNKLGAGIPQVARVSVLAGLCLWL VESAFFSTLL  
FTCRNIIGYAFSNSKEVVDYVANLTPLLCLS FILDGFTA VLNGVARGSGW  
QHIGALNNVVAYYLVGAPVGVYLA FNRELNGKGLWCGVVVGS AVQAI  
LAFVTASINWKEQAEKARKRMVSSENRLA

94 AT2G04080 MEEPFLPRDEQLVSCKSTWQSGQVTVLKKVSRLAAPMATVTIAQYLLP  
VISVMVAGHIGELELAGVALATSFTNVSGFSIMFGLVGALETLCGQAYG  
AEQYEKIGTYTYSAMASNIPICFIISILWIYIEKLLITLQEPDISRVAGSYS  
LWLVPALFAHAIFLPLTRFLLAQGLVISLLYSAMTTLLFHIAVCWTLVFA  
LGLGSNGAAIAISLSFWFYAVILSCHVRFSSCEKTRGFVSNDFMSSIKQY  
FQYGVPSAGLICLEWWLFELLILCSGLLPNPKLETSVLSICLTIGTLHYVIP  
SGVAAA VSTRVSNKLGAGNPQVARVSVLAGLCLWL VESAFFSTLLFTCR  
NIIGYTFSNSKEVVDYVADISPLLCLS FILDGLTAVLNGVARGCGWQHIG  
ALINVVAYYLVGAPVGVYLA FSREWNGKGLWCGVMVGS AVQATLLAI  
VTASMNWKEQAEKARKRIISTENGLV

95 AT2G04040 MEEPFLRDELLVPSQVTWHTNPLTVLKRVSRLAAPMATVTIAQYLLP  
VISVMVAGHNGELQLSGVALANSFTNVTGFSIMCGLVGALETLCGQAY  
GAKQYEKIGTYAYSIAASNIPICFLISILWLYIEKILISLGQDPEISRIAGSYA  
FWLIPALFGQAIVIPLSRFLLTQGLVIPLLFTA VTTLLFHVLVCWTLVFLFG  
LGCNGPAMATSVSFWFYAVILSCYVRFSSSCEKTRGFVSRDFVSSIKQFF  
QYGIPSAAMICLEWWLFEILILCSGLLPNPKLETSVLSICLT IETLHYVISA  
GVAAA VSTRVSNNLGAGNPQVARVSVLAGLCLWIVESAFFSILLFTCRNI  
IGYAFSNSKEVLDYVADLTPLLCLS FILDGFTA VLNGVARGSGWQHIGA  
WNNTVSY YLVGAPVGIYLA FSRELNGKGLWCGVVVGVSTVQATILAIVT  
ASINWKEQAEKARKRIVSTENRLA



96 AT2G04100 MEDPLLLGDNQIITGSLKPTPTWRMNFTAELKNLSRMALPMATVTVAQ  
YLLPVISVMVAGHRSELQLSGVALATSFTNVSGFSVMFGLAGALETLCG  
QAYGAKQYAKIGTYTFSAIVSNVPIVVLISILWFYMDKLFVSLGQDPDIS  
KVAGSYAVCLIPALLAQAVQQPLTRFLQTQGLVLPALLYCAITTLFHIPV  
CLILVYAFGLGSNGAALAIGLSYWFNVLILALYVRFSSSCEKTRGFVSD  
FVLSVKQFFQYGIPSAAMTTIEWSLFEFLILSSGLLPNPKLETSVLSICLTTS  
SLHYVIPMGIGAAGSIRVSNELGAGNPEVARLAVFAGIFLWFLEATICSTL  
LFICRDIFGYAFSNSKEVVDYVTELSPLLCISFLVDGFSAVLGGVARGSG  
WQHIGAWANVVAYYLLGAPVGLFLGFWCHMNGKGLWIGVVVGSTAQ  
GIILAIVTACMSWNEQA AKARQIRIVVRTSSFGNGLA

97 AT2G04090 MEDPLLLGDDQLITRNLKSTPTWWMNFTAELKNVSSMAAPMATVTVSQ  
YLLPVISVMVAGHCGELQLSGVTLATAFANVSGFGIMYGLVGALETLCG  
QAYGAKQYTKIGTYTFSAIVSNVPIVVLISILWFYMDKLFVSLGQDPDISK  
VAGSYAVCLIPALLAQAVQQPLTRFLQTQGLVLPALLYCAITTLFHIPVCL  
ILVYAFGLGSNGAALAIGLSYWFNVLILALYVRFSSACEKTRGFVSDDFV  
LSVKQFFQYGIPSAAMTTIEWSLFELLILSSGLLPNPKLETSVLSICLTSSSL  
HCVIPMGIGAAGSTRISNELGAGNPEVARLAVFAGIFLWFLEATICSTLLF  
TCKNIFGYAFSNSKEVVDYVTELSLLCLSMVDGFSSVLDGVARGSGW  
QNIGAWANVVAYYLLGAPVGFFLGFWGHMNGKGLWIGVIVGSTAQGI  
LAIVTA CLSWEEQA AKARERIVGRTLE

98 AT1G66780 MENGFSLVPKEEEEEEDYSNEKSEDQTSYYLSTEMMKKVSFMAAPMVA  
VAASQYLLQVISIVMAGHLDELSLSAVAIATSLTNVTGFSLIFGLAGALET  
LCGQAFGAGQFRNISAYTYGSMLCLLLVCFPISLLWVFMDKLELHFHQD  
PLISQLACRYSIWLIPALFGYSVLQSMTRFFQSQGLVLPFLSSLGALFFH  
VPFSWLLVYKLRFGIVGAALSIGFSYWLVNGLLWAFMRDSALYRKNWN  
LRAQEIFLSMKQFITLAIPTAMMTCLEWWSFELLILMSGLLPNSKLETSVL  
SICLTMSLHYVIVNAIGAAASTHVS NKLGAGNPKAARSAANSAIFLGM  
DAAIVSISLYSYRRNWAYIFSNESEVADYVTQITPFLCLSIGVDSFLAVLS  
GVARGTGWQHIGAYANIGSYLVGIPVGSILCFVVKLRGKGLWIGILVG  
STLQ TIVLALVTFFTNWEQEVAKARDRVIEMIPQEII

99      AT1G64820      METDFSLVRKEEEEEEDNRNGMSYLSMEMMKKVSSMAAPMVAVSVSQ  
 FLLQVISMVMAGHLDELSLSAVAIATSLTNVTGFSLIVGFAGALDTLCGQ  
 AFGAEQFGKIGAYTYSSMLCLLVFCFSISIVWFFMDKLEIFHQDPLISQL  
 ACRYSIWLIPALFGFTLLQPMTRYFQSQGITLPLFVSSLGALCFHIPFCWL  
 LVYKLFKFGIVGAALSIGFSYWLVNLFLLWIFMRYLSALHREMKNLGLQELI  
 SSMKQFIALAIPSAMMICLEWWSFEILLMSGLLPNSKLETSVISICLT TSA  
 VHFVLVNAIGASASTHVSNELGAGNHRAARA AVNSAIFLGGV GALIT TIT  
 LYSYRKS WGYVFSNEREVVRYATQITPILCLSIFVNSFLAVLSGVARGSG  
 WQRIGGYASLGSYYLVGIPLGWFLCFVMKLRGKGLWIGILIASTIQLIVF  
 ALVTFFTNWEQEATKARDRVFEMTPQVKGNQKTQIIVEEDTQVLLNHIA  
 ETV

100     AT1G66760      MKKSIETPLLLNTKQSQDEDEKIRWEKMKKVASMAAPMVAVNMSQY  
 LLQATSTMIVGHRSELALAGIALGSSSFANVTGFGVLFGLSGSLETLCGQA  
 YGAKQYHKLGSYTFTSIVFLLIISVPISILWMFMNQILLLLHQDPQIAELA  
 GUYCLWLVPALFGYSVLESLVRYFQSQSLIYPMVLSSLAALS FHVPLCW  
 LMVHKFDGAKGAAASIGISYWLNAVFLWVYMKRSSRCVETRIYMSKD  
 VVHTNIFFQFAIPSAMMCLEWLA FEVITLLSGLLPNSKLETSVISICLT T  
 SSLHYNLVNGIGDAASTNVANELGAGNPRGARDSAAAIIIAAVESVIVS  
 SSLFLSRSVWPYAYS NVEEVISYVTDITPILCISILMDSFLT VLSGIVRG TG  
 WQKIGAYVNITSYYVIGIPVGLLLCFHLHFNGKGLWAGLVTGSTLQTLIL  
 FLVIGFTNWSKEAIKARERIGDEKVWRHDSLLN

101     AT1G15170      MGDAESTKDRLLLPVERVENVTWSDLRDGSFTVELKRLIFFAAPMAAV  
 VIAQFMLQIVSMVMVGHGLGNLSLASASLASSFCNVTGFSFIIGLSCALDT  
 LSGQAYGAKLYRKLGVQTYTAMFCLALVCLPLSLIWFNMEKLLLLILGQD  
 PSIAHEAGKYATWLIPGLFAYAVLQPLTRYFQNQSLITPLLITSYVVFCH  
 VPLCWFLVYNSGLGNLGGALAISLSNWLYAIFLGSFMYYSACSETRAP  
 LSMEIFDGIGEFFKYALPSAAMICLEWWSYELIILLSGLLPNPQLETSVLS  
 VCLQTISTMYSIPLAIAAASTRISNELGAGNSRAAHIVVYAAMSLAVID  
 ALIVSMSLLIGRNLFHGHISSDKETIDYVAKMAPLVSISLMLDALQGVLSG  
 IARGCGWQHIGAYINLGAFYLVGIPIAASLAFWIHLKGVGLWIGIQAGA  
 VLQTL LALVTGCTNWESQADKARNRMALAYGT

102 AT1G15180 MGDAESTSKTSLLLPVERVENVTWRDLRDGLFTAELKRKICFAAPMAAV  
VIAQFMLQIISMVMVGH LGNLSLASASLASSFCNVTGFSFIVGLSCALDT  
LSGQAYGAKLYRKVGVQTYTAMFCLALVCLPLTLIWLNMETLLVFLGQ  
DPSIAHEAGRYAACLIPGLFAYAVLQPLTRYFQNQSMITPLLITSCFVFL  
HVPLCWLLVYKSGLGNLGGALALSFSNCLYTIILGSLMCFSSACSETRAP  
LSMEIFDGIGEFFRYALPSAAMICLEWWSYELIILLSGLLPNPQLETSVLSV  
CLQTTATVYSIHLAIAAAA STRISNELGAGNSRAANIVVYAAMSLAVVEI  
LILSTSLVGRNVFGHV FSSDKETIDYVAKMAPLVSISLILDGLQGVLSGI  
ARGCGWQHIGAYINLGAFYLWGIPIAASLAFWIHLKGVGLWIGIQAGAV  
LQTLTLLT VTGCTNWESQADKARNRMALAYGT

103 AT1G71160 MESSFHFINEALLITQTFITFHQFLVASACVLIAVFGYYFFKPRCIIYLIDFS  
CYQPPDFLRAPVSNFIEHLTISGVFDQESLDLQKILERSGISDDASVPAT  
VHEIPPNASISAAREETHEILFAIVQDLFSKHEIDPKSIDILVSNCSLFCPSPS  
ITSMIINKFGMRSDIKSFSLSGMGCSAGILSVNLVKDLMKIHGDSLALVLS  
MEAVSPNGYRGKCKSMLIANTIFRMGGAAILLSNRKQDSHKAKYKLQHI  
IRTHVGS DTESYESVMQQVDEEGKVGVALSKQLVRVASKALKINVVQL  
GPRVLPYSEQLKYIISFIQRK WGMHKEIYTPNFKKAFEHF CIHAGGRAIIE  
GVEKHLKLDKEDVEASRSTLYRYGNTSSSSLWYELQYLEAKGRMKMG  
DKVWQIGFGSGFKANSAVWKCISEIDSRGRNAWSDRIHLYPVC GDTSSA  
LKTELLS

104 AT1G71150 MAKPNIDELNQILTSYQNTINDTLQLFEQVPSPTQDKLYWNDVLQISDHL  
SKQATIVGMLWITGEPKAEAMKETMEAYFNALQGFLHCHGSMVGGAG  
TTLSS TIHASVKQIVDSSFRLLQGSVSLYEGSYEKGRKPTIPQLAGAVWE  
ACSNLKNVPETNIKAIGRAMAHVAVSMKDVLREMKELKPASSSPDHNV  
STNSDDDDL GDELSPEEFEVAKMVADIVSETLVVIKELIRAITCMIKLENP  
KDNSEFVDSFEKLLKLCQGIGVQIDELGACVYPPQEFGLMKQTVENMRE  
SIGEIESDVKSSKNSSSEALS GSCRRLQSLIEHMVTELDTRIEAEVVYKMQ  
NVTL

105 AT1G71140 MDSA EKGLLVVSDREEVNKKDGF LRET KKL SYIAGPMIAVNSSMYVLQ  
VISIMMVGH LGELFLSSTAIAV SFCSVTGFSVVFG LASALETLCGQANGA  
KQYEKLG VHTYT GIVSLFLVCIPLSLLW TYIGDILSLIGQDAMVAQEAGK  
FATWLIPALFGYATLQPLVRFFQAQSLILPLVMSSVSSL CIHIVLCWSLVF  
KFG LGS LGAAIAIGVSYWLNVTVLGLYMTFSSSCSKSRATISMSLFEGMG  
EFFRFGIPASMICLEWWSFEFLVLLSGILPNPKLEASVLSVCLSTQSSLYQ  
IPESLGAAASTRVANELGAGNPKQARMAVYTAMVITGVESIMVGAIVFG  
ARNVFGYLFSSETEVDYVKS MAPLLSLSVIFDALHAALSGVARGSGRQ  
DIGAYVNLAAYYLFGIPTAILLAFGFKMRGRGLWIGITVGSCVQAVLLGL

IVILTNWKKQARKARERVMGDEYEEKESSEEEHEYIS

- 106 AT2G34560 MATDEPSQTRWSFLEFKTFYDAKFRKKLPEEDVSNKDQPEDGSSNGN  
NGDVNNNSSPVTNQDGNTALANGNVIREKPKKSMFPPFESAETRTLAE  
LSRDIIRGNPNIKWESIKGLENACKLLKEAVVMPIKYPTYFNGLLTPWKG  
ILFGPPGTGKTMLAKAVATECNTTFFNISASSVSKWRGDSEKLIRVLF  
DLARHHAPSTIFLDEIDAIISQRGGEGRSEHEASRRLKTELLIQMDGLQKT  
NELVFVLAATNLPWELDAAMLRRLEKRILVPLDPEARREGMFEMLIPSQ  
PGDEPLPHDVLVEKSEGYSGDIRILCKEAAMQPLRRTLAILEDREDVVP  
EDELPGKIGPILPEDIDRALSNTSRPSAHLHAHLYDKFNDDYGSQILK
- 107 AT5G52450 MRDDREREGEDLSWPLIGEKSSVKEEVKKQLWLSGPLIAVSLLQFCLQV  
ISVMFVGHGLGSLPLSAASIATSFASVTGFSFLMGTASALDTLCGQAYGAK  
KYGMLGIQMQRAMFVLTLASIPLSIIWANTEHLLVFFGQNKSIATLAGSY  
AKFMIPSIFAYGLLQCFNRFLQAQNNVFPVVFCSGVTTSLHVLLCWVLFV  
KSGLGFQGAALANSISYWLNVLLFCYVKFSPSCSLTWTGFSKEALRDIL  
PFLRLAVPSALMVCLEMWSFELLVLLSGLLPNPVLETSVLSICLNTSGTM  
WMIPFGLSGAASTRISNELGAGNPKVAKLAVRVVICIAVAESIVIGSVLILI  
RNIWGLAYSSELEVVSYSVASMMPILALGNFLDSLQCVLSGVARGCGWQ  
KIGAIINLGSYYLVGVPSGLLLAFHFHVGGRGLWLGICALVVQVFLGLL  
VTIFTNWDEEAKKATNRIESSSSVKDFAVDDRSVVVF
- 108 AT1G73700 MEDGVTPLLITEKDTTMRVKEEVKKQLWLSAPLIGVSLLQYSLQVISV  
MFVGHGLGSLPLSAASIATSFASVTGFTFLLGTASALETLCGQAYGAKLYG  
KLGIQMQRAMFVLLILSVPLSIIWANTEQILVLVHQDKSIASVAGSYAKY  
MIPSLFAYGLLQCINRFLQAQNNVFPVVFCSGITTCLEHLLCWLFVLTG  
LGYRGAALAISVSYWFNVILLSCYVKFSPSCSHSWTGFSEAFQELYDFS  
KIAFPSAVMVCLELWSFELLVLASGLLPNPVLETSVLSICLNTSLTIWQIS  
VGLGGAASIRVSNELGAGNPQVAKLAVYVIVGIAVAEGIVVVTVLLSIRK  
ILGHAFSSDPKIIAYAASMIPVACGNFLDGLQCVLSGVARGCGWQKIGA  
CVNLGSYYLVGVPLGLLGFHFHIGGRGLWLGIVTALSQVLCVLTIF  
TNWDKEAKKATNRVGSDDDKDGDVQ

109 *Pt*XP002307572 MGESEYQTPLELDHSHRIRDLSSVTIEEFLEHGPVAVRWWPRLVAVES  
RLLWILSGSSIIVSVSTFMLSFTVQMFSGHLGALELAGASIANVGIQGLAY  
GIMLGMASAVQTVCGQAYGAKKYSSMGIIICQRAIHLHLGAAFLLTFLYW  
FSGPVLRAIGQTESIAEQGEIFARGLIPQLYAFASFSCPMQRFLQAQNIVNP  
LAYMSVAVFLLHILLTWIVVYVLQYGLLGAALTSFSWWLFLVILNGLYII  
LSPCKETWTGLSASAFTGIWPYFKLTVSSAVMLCLEIWYSQGLVLISGL  
LTDPTVALDSISICMNYLNWDMQFMLGLSASTSVRVGNELGAGHPKVA  
KLSVMVNGTSIVISIIIFSAIVLIFRVGLSKLFTTDYEVIDAVSDLTPLLAI  
VFLNGIQPILSGVAIGSGWQATVAYVNLATYYVIGLPIGCVLAFKTS LGV  
AGIWWGMVAGVLLQTITLILTARTNWDTEVQNAEAERVKKSANEDFSG  
LVEAI

110 *Vv*XP002282932 MGSEYQPLLLGLNSHARIPDLSSFAVEEFLAHPVAVRWWPRLFGWES  
RLLWLLSGSSIVASIFNYMLSFTVLMFTGHLGALELAGASIASVGIQGLA  
YGIMLGMASAVQTVCGQAYGAKKYKAMGIIICQRAIHLHLGAAVLLTFL  
YWFSGPFLRAIGQSDSISAQGQIFARGLILQLYAFASCPMQRFLQAQNIV  
NPLAYMAVGVFFLHVLLTWLVVYVLDYGLLGAALTSFSWWILVVVIA  
LYILLSPCKETWTGFSSKAFKGMWPYFKLTVASAVMLCLEIWYNQGLV  
LISGLLSNPTISLDSISICMNYLNWDMQFMLGLSAASTSVRSNELGASHP  
KVAKLSVLVVNTNSIIISIFFSAIILIFKVGLSKLFTNDAEVIEAVSNLTPLL  
AISVFLNGIQPILSGVAIGSGWQAIVAYVNLATYYLIGLPIGCVLGFKTSL  
GVAGIWWGMIIGVLLQTVTLILTARTDWNDAEVSKAAERLRNSANVENL  
NLEDV

111 *Vv*CAO69962 MASAAEDGEPLLLGHSSAGIHELSSSAVEELLHKPVPGRWWPRLFGWE  
SRLWVLSGSAIVSSVFNMYLSFITLMFAGQLGALELAGASIASVGIQGL  
AYGLMLGMASAVQTVCGQAYGAKKYAAMGIIICQRAIVLHLGAAILLTF  
LYWYSGAFLKAIGQSESAVQGGQIFARGLILQVYAFALSCPMQRFLQAQN  
IVNPLAYIAVGVTLHILLTWLVVNVLD SGLLGIALTSLSWWLLVFSIA  
LYILLSPCKETWTGFSLKAFQGIWPYFKLTVASAVMLCLEIWYSQGLVL  
ISGLLPNPTVSLDSISICMNYLNWDITFMLGLSAGASVRISNELGAAHPLV  
AKFSVLVVNANSIIISIFFSAIVLIFKIGLSKLFTSDTEVINAVSNLTPLLAI  
VFLNGIQPILSGVAIGSGWQAIVAYVNLATYYLIGLPIGCVLGFKTSLGVV  
GIWWGMIIGVLLQTVTLIVLTARTNWD AEVILWVD

112 *MdGU064953* MGSQEEYQPLLIRLDSYSQIPNLSSSAIEEFLEHKPVAVRWWPKLVAWES  
RLLWILSGSSIAVSIFNYMLSFVTLMFCGHLGALELAGASIASVGIQGLAY  
GIMLGMASAVQTVCGQAYGAKQLPAMGIICQRAIHLHLGAAVLLTFVY  
WWSGPILIAIGQTEDIAEQGQVFARGIIPQLYAFAINCPQQRFLQAQNI  
PLAYMSFGVFLVHILLTWVVVYVVDYGLMGAALTLSLSWLLVITYGI  
YILVSPMCKETWTGFSWKAFRGIWPYFKLTLASAIMLCLEIWYNQGLVL  
ISGLLSNPTISLDSISICMNYLNWDMQFMLGLSAAASVRVSNELGAGHPK  
VAKFSVFVNGTSSILISIVFSAIILFRVGLSKLFTSDAEVIAAVSDLTSLLA  
SVFLNGIQPILSGVAIGSGWQAVVAYVNLTCYIIIGLPIGCVLGFKTSMG  
VAGIWWGMIIGVFLQTVTLIVLTARTNWDSEVVKAAERLKKASAERLD  
LVTDI

113 *MdGU064955* MGTAEYQPLLNGLDSSSRIPDLSSTAVEEFLEHKPVAVRWWLRLVAW  
ESRLLWTLSGSSIIVSIFNYMLSFTTLMFCGHLSALELAGASIASVGIQGLA  
YGIMLGMASAVQTVCGQAYGARQYPAMGIICQRAIVLHLGAAVLLTFL  
YWWSGPILIAIGQTEEIAEQGQVFARGIVPQLYAFAINCPQQRFLQAQNI  
NPLAFMSFGVFLVHILLSWVVVYVADYGLTGAALTSFSWLLVIVYGI  
YIVVSPKCKETWTGFSGKALWGIWPYFKLTVASAIMLCLEIWAYSQGLVL  
ISGLLANPTIALDSISICMNYLNDMQFMLGLAAAASVRVSNELGAGHAK  
VAKFSVFVNGTSSILISIIFTAIIILFRVALSKLFTSDDEVVTA VSNLTPLLAI  
SVFLNGIQPILSGVAIGSGWQAVVAYVNLTCYIIIGLPIGCVLGFKTSMG  
VAGIWWGLIIGVFLQTVTLIVLTARTNWTAEVEKAAERLKRASAERLK  
RSASAERLDLVTDI

114 *BnACJ36209* MSSTETYEPLLRRLHSDSQITERS SPEIEEFLGRGRSTVTTRWWLRLFVW  
ESKLLWKLSGASIVVSVLNMYMLSFVTVMFTGHLGSLELAGASIA TVGIQ  
GLAYGIMLGMASAVQTVCGQAYGARQYSSMGIICQRAMVLHLAAAVL  
LTFLYWYSGPILKAMGQTV AIAHEGQVFARGMIPQIYAFALACPMQRFL  
QAQNI NPLAYMSLGVFLHLLTWLV TNVLD FGLLGAALILSLSWLL  
AAVNGLYIVMSPSCRETWTGFSARALTGIWPYLKLTVASAVMLCLEIWI  
NQLVIIISGLLTNPTISLDAISICMYL N WDMQFMLGLSAAISVRVSNEL  
GAGNPRVAKLSVVVVNITTVLISLLLCIVVLVFRVGLSKAFTSDKEVIVA  
VSDLFPLLA VSIFLNGIQPILSGVAIGSGWQAVVAYVNLV TYYVIGLPIG  
VLGFKTS LGVAGIWWGMIAGVILQTITLIVLTLRTNWTSEVENAAHRLK  
ASANESQEMATEGV

115 *BnACJ36211* MSSTETYEPLLRRLHSDSQITERSSPEIEEFLGRGRSTVTPRWWLRLFVWE  
SKLLWKLSGASIVVSVLNYMLSFVTVMFTGHLGSLELAGASIATVGIQG  
LAYGIMLGMASAVQTVCGQAYGARQYSSMGIICQRAMVLHLAAAVLL  
TFLYWYSGPILKAMGQTV AIAHEGQVFARGMIPQIYAFALACPMQRFLQ  
AQNIVNPLAYMSLGVFLLHTLLTWLV TNVLD FGLLGAALILSFSWWLLA  
AVNGLYIVMSPSCRETWTGFSARALTGIWPYLKLTVASAVMLCLEIWYN  
QGLVIISGLLTNPTISLDAISICMYL N WDMQFMLGLSAAISVRVSNELG  
AGNPRVAKLSVVVVNITTVLISLFLC VVVLVFRVGLSKAFTSDKEVIVAV  
SDLFPLLA VSIFLNGIQPILSGVAIGSGWQAVVAYVNLVTYYVIGLPIGCV  
LGFKTSLGVAGIWWGMIAGVILQTITLIVLTLRTNWTSEVENAAHRLKA  
SANESQEMATEGV

116 *BrACJ36214* MSSTETYEPLLRRLHSDSQITERSSPEIEEFLGRGRSTVTPRWWLRLFVWE  
SKLLWKLSGASIVVSVLNYMLSFVTVMFTGHLGSLELAGASIATVGIQG  
LAYGIMLGMASAVQTVCGQAYGARQYSSMGIICQRAMVLHLAAAVLL  
TFLYWYSGPILKAMGQTV AIAHEGQVFARGMIPQIYAFALACPMQRFLQ  
AQNIVNPLAYMSLGVFLLHTLLTWLV TNVLD FGLLGAALILSFSWWLLA  
AVNGLYIVMSPNCRETWTGFSARALTGIWPYLKLTVASAVMLCLEIWY  
NQGLVIISGLLTNPTISLDAISICMYL N WDMQFMLGLSAAISVRVSNEL  
GAGNPRVAKLSVVVVNITTVLISLLL CIVVVLVFRVGLSKAFTSDKEVIVA  
VSDLFPLLA VSIFLNGIQPILSGVAIGSGWQAVVAYVNLVTYYVIGLPIGC  
VLGFKTSLGVAGIWWGMIAGVILQTITLIVLTLRTNWTSEVENAAHRLK  
ASANESQEMATEGV

117 *BoACJ36215* MSSTETYEPLLRRLHSESQITERSSPEIEEFLGRGRSTVTPRWWLRLFVWE  
SKLLWKLSGASIVVSVLNYMLSFVTVMFTGHLGSLELAGASIATVGIQG  
LAYGIMLGMASAVQTVCGQAYGARQYSSMGIICQRAMVLHLAAAVLL  
TFLYWYSGPILKAMGQTV AIAHEGQVFARGMIPQIYAFALACPMQRFLQ  
AQNIVNPLAYMSLGVFLLHTLLTWLV TNVLD FGLLGAALILSLSWWLLA  
AVNGLYIVMSPSCRETWTGFSARALTGIWPYLKLTVASAVMLCLEIWYN  
QGLVIISGLLTNPTISLDAISICMYL N WDMQFMLGLSAAISVRVSNELG  
AGNPRVAKLSVVVVNITTVLISLFLC VVVLVFRVGLSKAFTSDKEVIVAV  
SDLFPLLA VSIFLNGIQPILSGVAIGSGWQAVVAYVNLVTYYVIGLPIGCV  
LGFKTSLGVAGIWWGMIAGVILQTITLIVLTLRTNWTSEVENAAHRLKA  
SANESQEMATEGV

118 VvCAO69963 MGSEEQPLLLGLNSHARIPDLSSFAVEEFLAHKPVAVRWWPRLFGWES  
RLLWLLSGSSIVASIFNYMLSFVTLMTGHLGALELAGASIASVGIQGLA  
YGIMLGMAVAVQTVCGQAYGAKKYKAMGIICQRAIHLHGAAVLLTFL  
YWFSGPFLRAIGQSDSISAQGQIFARGLILQLYAFASCPMQRFLQAQNV  
NPLAYMAVGVFFLHVLLTWLVVYVLDYGLLGAALTSFSWWILVVVIA  
LYILLSPCKETWTGFSSKAFKGMWPYFKLTVASAVMLCLEIWYNQGLV  
LISGLLSNPTISLDSISICMNYLNWDMQFMLGLSAATSVRVSNELGASHP  
KVAKLSVLVNTNSIIISIFFSAILIFKVGLSKLFTNDAEVIEAVSNLTPLL  
AISVFLNGIQPILSGVAIGSGWQAIVAYVNLATYYLIGLPIGCVLGFKTSL  
GVAGIWWGMIIGVLLQTVTLIILTARTDWNAEVSKAAERLRNSANVENL  
NLEEDV

119 VvACN91542 METPLLNSGAEEGYSGPDGDYQPLRSWREVRSMVWKETVKLWRVAGP  
LAFQILCQFGTNSMTSVFVGHIGNLQLSAVSISLSVIGTFSFGFMLGMGSA  
LETLCGQAYGAGQVHLLGVYLRQSWIILLVTCVILSPVYVFATPILKVLG  
QEDAIADLAGQFTIETIPQLFSLAIIFPTQKFLQAQSKVNVQATIAFVALIL  
HIGMLSVFIFVFGWGTTGAAIAYDISNWVIAVSQVVYAIGWCKEGWTGL  
TWSAFREIWAFFVRLSIASAVMLCLEIWFYFTIIVLLTGHLQNAVIAVGSLSI  
CMTFNGWEGMLFIGMNAALSIRVSNELGYGHPRAAKFSVYVAVSQSLLI  
GILCMVVVLLARDYIAIFTSNKEMQEAVSNLAYLLGATMLLNSMQPVL  
SGVAVGSGWQALVAYINLGCYYIIGVPLGCLLGYLAKFGVKGLWGGMI  
CGTALQTLILLFIVYRTNWNKEVEQTTTERMQKWGGVQIETKKTSDDV

120 VvACN88706 METPLLKSGAERGYGGEGGDYPLTTWREVRSMWRETVKVWRVAGP  
LAFQILCQFGTNLVTTVFVGHIGNLELSAVSISVSVIGTFSFGFMLGMGSA  
LETLCGQAYGAGQVQLLGVYLRQSWIILLVSCIILLPIYIFATPILKALGQE  
DEIADLAGQFTLETIPQLFSLAIIFPTQKFLQAQSKVNVQATICFVALILDI  
GMLAVFIFVFGWGTTGAAIAYDISSWVTAQAQVVYAISWCKEGWTGLT  
WSAFREIWAFFVRLSLASAVMLCLEIWFYFMIIILLTGHLQNAVIAVGSLSIC  
MTFGGLEVVFMGMNAAVSIRVSNELGYGHPRAAKYSVFVAVSQSLLI  
GIFCMVVVLLARDYIAIIFTTNKEMQEAVSHLAYLLGVTMLLNSLQPVFS  
GVAVGGGWQAMVAYINLGCYYIIGIPLGYLLGYKAKLGVQGLWGGMI  
CGTALQTLVLLFIVYRTNWNREVEQTTTERMQKWGGQRIEADDV



121 *Le*AAQ55183 METPLLNGYSGGERNDLIGADGDYRPAKSTKDWWAIFCVETLKLWRI  
GGPIAFNIICQYGVNSLTNIFVGH LGNVELSAISIAQTVISTFSFGFMMGM  
GSALETLCGQAYGAGQVHMLGVYMQRSIILLATCVFLLPIYLF TTPLLV  
LLGQETAIADLSGRYTMLLIPQLFSLAINFPTSKFLQAQSKVDVLAGIGFA  
AVLVHALFLWLFYITLEWGTNGAAIAFDLTNWLTAMAQLAYVVGWCK  
DGWKGLSWSAFNEIWAFVRLSIASAVMLCLEIWYMM S IILLVGH LNNA  
VIAVGSISICMNINGWESMLFIGINA AISIRVSNELGQGHPRATKYSVYITV  
FQSL LIGILCMVIVLVARDHLAIIFSNSKEMQEAVADLAYLLGITMVLNS  
VQPVISGVAVGGGWQALVAYINLGCYYVFGLPLGYLLGYVAKLGTKGL  
WLGMIAGAALQ T L L L L I L Y K T N W N K E V N D T T E R M R K W G G Q D F E T Q K S  
ADGQLTIENGGVA

122 *Mp*BAB71817 MAKHSLKQPLLDKEDQPPVLPSSYNGSESQGLAEEP KGEFKTWLVEEL  
THQFWLAGPMILVNLLQYLLNVVSVMFVGH LGELALASSSIATSLAGVT  
GYHVMMGLASALETLCGQAFGAKEYRLSGIFLQRAIFVLTLC AFPISFV  
WWHMG TILKFIGQDPSISDGAMEYARFLIPSLFAY AFLQPLVKFLQTQSA  
VNSMAVFSGITLLFHAPLCYMLVFYFGIGFRGAAIANSISQWINVIFLALY  
VRFSP TCKRTWTGFSREALHDIFYFLKLA VPSTVMVCLEYWC FESIVLLS  
GLLPNPKLETSALAICLNTIALMYMVPFGLSAAVSTRVSNELGAGRPYA  
AKAAVKLTVSLALLEGCLMSILLISVRGVWPYLYSGDAE VVN YVSKMV  
PFLATLAILDGFQGTLCGVARGCGWQHLGAYTNLGA FYVIGIPTALLMA  
FHFHLNGYGLWIGIICGLVTQAFLLAVITLTLNWQKLAD EATDRVHHSY  
VEGDVLPKHGQKVDHSQLTQ

123 *Nt*CAQ51477 MVEELPQSLKEKKWQINWDAVSQELKKT SRFMAPMVA VT VFQYLLQV  
VSVMMVGH LGELALSSVAIATSLTNVTGFSLLTGLVGGMETLCGQAYG  
AQQYHKLSTYTYTAIISLFLVCIPICVLWCFMDKLLILTGQDHSISVEARK  
YSLWVIPAIFGGAISKPLSRYSQAQSLILPMLLSSFAVLCFHLPI SWALIFK  
LELGNIGAAIAFSISSWLYVFLAS YVKLSSSCEKTRAPFSMEAFLCIRQFF  
RLAVPSAVMVCLKWWSFEVLALVSGLLPNPKLETSVMSICITISQLHFSIP  
YGFGAAASTRVSNELGAGNPQKARMAVQVVMFLT VVETLVFN TSLFGS  
RHVLGKAFSNEKQVVDYIAAMTPFLCLSIVTDSLQIVITGIARGSGWQHI  
GAYINLVV F Y V I A I P L A V V L G F V L H L K A K G L W I G I V V G C A I Q S I V L S I V T G  
FTDWEKQAKKARERVHEGRS

124 *Hv*BAF75822 MEEGAAASMMTGDKKWVA VVDVPADADAATA ANGHGPEEKAAEDLP  
AALSGCPRTTGLYLFVMNIRSVFKLDELGSEVLRIAVPASLALAADPLAS  
LVDTAFIGRLGSVEIAAVGV SIAIFNQVSKVCIYPLVSVTTSFVAEEDAIS

KYLEENSSQDLEKASHVHSDACNVPASGPDTPVCANSCTEPTDLSNQ  
GCKKRYIPSVTSALIVGSFLGLVQAVFLIFS AKFVLGIMGVKHDSPMLEP  
AVRYLTIRSLGAPAVLLSLAMQGVFRGFKDTKTPLYATVVGDATNIILDP  
ILMFVCHMGVTGAAVAHVISQYLITMILICRLVQQVDVIPPSLKS LKFR  
FLGCGFLLARVVAVTFCVTLASSLAARDGPTIMAAFQICQWLATSLL  
ADGLAVAGQAVLASAFKNDHKKVIAATSRVLQLSIVLGMGLTVVVLG  
FMKFGAGVFTRDADVINVIIHKGIPFVAGTQTINALAFVFDGINFGAQDYT  
YSAYSMVGVASISIPCLVYLSAHKGFIGIWWALTIYMSLRTVASTWRMG  
AARGPWVFLRK

125 *Sbi*ABS89149 MEEHRSPAHAKPEAEQPPQQVPAAMAVAVVDVAAPAALQNSTAAP  
AENDVAAAGAAENGTAASAANGDGGGSELLGGPRWTGLHLFVMNIR  
SVFKLDELGAEVLGIAVPASLALTADPLASLIDTAFIGRLGSVEIAAVGVA  
IAVFNQVMKVCYIPLVSVTTSFVAEEDAVLSKGGAKVIDNGEEEELEA  
GQVGPEKHTAAAGADPEKQQQPADEEAAKNGGEGCAPAVVAGRSSGK  
KSGNRRFVPSVTSALIVGALLGLFQTVFLVAAGKPLLRMLMGVKPGSPMV  
MPALRYLTLRALGAPAVLLSLAMQGVFRGFKDAKTPLYAIVAGDAANI  
VLDPILIFGCR LGVIGAAIAHVLSQYLITLIMLSKLVKVDVPPSLKCLK  
FRRFLGCGFLLARVVAVTFCVTLAASLAARHGPTAMAAFQICTQVWL  
ATSLADGLAVAGQAMIASAFKEDRYKVAATAARVLQLGVVLGAAL  
TALLGLGLQFGAGVFTSDAAVIKTIRKGVFPVAGTQTLNTLAFVFDGINF  
GASDYAFSAYSMIGVAAVSIPSLIFLSSHGGFVGIWWALTIYMGVRLAS  
TWRMAAAQGPWKFLRQ

126 *Mt*HM856605 MDSHTPLLNTTAATSSSELELDGGDYLEVKGFQARKVFAIETLRIWK  
IALPIVFNILCQYGVNSITNIFVGHLDIQLSAISLINSVIGTFAFGFMLGMG  
SATETLCGQAFGAGQVHMLGVYMQRSWILFVTSIILLPIYIFAAPILKLL  
GQQEDMADLAGSFALLVIPQFLSLSFNFTQKFLQSQSKVNVIWIGLVA  
LIVHIGLLWLLIYVLDLGLTGAAIAFDVTSWGITLAQLVYVVIWCKDCW  
NGLSWLALKDIWAFVRLSVASAVMLCLEIWYMMSLIVLAGHLDNAVIA  
VDSISICMNFNGWEGMIFIGVNAAISVRVSNELGLRHPRAAKYSVYVTVF  
QSLFMGIFFMGVILVTKDYFAIVFTNSKTLQVAVADLGNLLAVTMVLNS  
VQPVISGVAVGGGWQALVAYINVCYYLFLGLPLGYILGNVAELGVKGL  
WGGMICGILLQTLLLSGILYKTNWNKEVDNTSARVQQWGGQTVEVDSN  
GVDKP

MENQPFLVGLDSHSHTHIADLSSDAIEEFLEHRPIGLRWWLKLVAWESR  
LLWILSGASIVVYLCNFMLSFVTMMFCGHLGSLELAGASIASVGIQGLAY  
GIMLGMASAVQTVCGQAYGAKKHAAMCITLQRAIILHFGAAVILTFLY  
WFSGDFLKVIGQTESIAVQQQVFARGLIPQLYAFASFQPMQRFLQAQNIV  
NPLAYMAVGVLLLHALLSWLVVVVLGYGLLGAALTSFSSWWILVFLNA  
LYIIFSPKCKETWTGFTMKAFIGIWPYFKLTVASAVMLCLEIWYNQGLVL  
ISGLLSNPTVALDSISICMNYLNWDMQVMLGLGAAASVRISNELGAAHP  
RVAKFAIFVVNGNSILISVVLSAIILIFRDGLRNLFSDSEVIEAVSDLTPLL  
AISVLLNGIQPILSGVAIGSGWQALVAYVNLACYVIGLTVGCVLGFKTS  
LGVAGIWWGMILGVFIQTVTLIILTARTNWGVEVEKAIVRVKRSAEDDT  
LDRLVADV

---

**Table S3** List of the cis-regulatory elements present in promoter region of OsMATE1 and OsMATE2

| <b>Common elements in OsMATE1 and OsMATE2</b> | <b>Elements only in OsMATE1</b> | <b>Elements only in OsMATE2</b> |
|-----------------------------------------------|---------------------------------|---------------------------------|
| ABRELATERD1                                   | 2SSEEDPROTBANAPA                | -10PEHVPSBD                     |
| ABRERATCAL                                    | AACACOREOSGLUB1                 | -300ELEMENT                     |
| ACGTATERD1                                    | ABREOSRAB21                     | AMMORESIIUDCRNIA1               |
| ANAERO1CONSENSUS                              | ACGTABOX                        | BIHD1OS                         |
| ARR1AT                                        | ACGTCBOX                        | BOXLCOREDPCAL                   |
| CAATBOX1                                      | ACGTOSGLUB1                     | CEREGLUBOX2PSLEGA               |
| CACTFTPPCA1                                   | AMMORESIVDCRNIA1                | CPBCSPOR                        |
| CATATGGMSAUR                                  | ANAERO3CONSENSUS                | ERELEE4                         |
| CCAATBOX1                                     | ASF1MOTIFCAMV                   | GAGA8HVBKN3                     |
| CGACGOSAMY3                                   | CANBNNAPA                       | GAGAGMGSA1                      |
| CGCGBOXAT                                     | CARGCW8GAT                      | GT1GMSCAM4                      |
| CURECORECR                                    | CARGNCAT                        | HEXAMERATH4                     |
| DOFCOREZM                                     | CBFHV                           | INRNTPSADB                      |
| EBOXBNNAPA                                    | CCA1ATLHCB1                     | MARARS                          |
| ECCRCAH1                                      | DPBFCOREDCDC3                   | NODCON1GM                       |
| GATABOX                                       | DRECRTCOREAT                    | NODCON2GM                       |
| GCCCORE                                       | E2FCONSENSUS                    | OSE1ROOTNODULE                  |
| GT1CONSENSUS                                  | HEXMOTIFTAH3H4                  | OSE2ROOTNODULE                  |
| GTGANTG10                                     | LTRECOREATCOR15                 | POLASIG1                        |
| LECPLEACS2                                    | MARTBOX                         | POLASIG2                        |
| MYBCORE                                       | MYB1AT                          | POLASIG3                        |
| MYBST1                                        | MYB1LEPR                        | S1FBOXSORPS1L21                 |
| MYCCONSENSUSAT                                | MYB2AT                          | SEF3MOTIFGM                     |
| P1BS                                          | MYB2CONSENSUSAT                 | T/GBOXATPIN2                    |
| POLLEN1LELAT52                                | MYBPLANT                        | TATABOX2                        |
| PRECONSCRHSP70A                               | MYBPZM                          | TATABOXOSPAL                    |
| RAV1AAT                                       | NAPINMOTIFBN                    | TATCCAOSAMY                     |
| ROOTMOTIFTAPOX1                               | PE2FNTRNR1A                     | TBOXATGAPB                      |
| SEF4MOTIFGM7S                                 | PROXBNNAPA                      | WBOXPCWRKY1                     |
| SORLIP1AT                                     | RAV1BAT                         | WBOXHVISO1                      |
| SURECOREATSULTR11                             | REBETALGLHCB21                  |                                 |
| TAAAGSTKST1                                   | RHERPATEXPA7                    |                                 |
| TATABOX5                                      | RYREPEATBNNAPA                  |                                 |
| WBOXATNPR1                                    | RYREPEATGMGY2                   |                                 |
| WBOXNTERF3                                    | RYREPEATLEGUMINBOX              |                                 |

WRKY71OS

SITEIIATCYTC

SORLIP2AT

SORLIP5AT

SV40COREENHAN

TATABOX3

WUSATAg

---

**Table S4** Various cis-elements, sequences, nucleotide position and ID of OsMATE1

| <b>Cis- elements</b> | <b>Nucleotide position</b> | <b>Sequence of cis- elements</b> | <b>ID</b> |
|----------------------|----------------------------|----------------------------------|-----------|
| 2SSEEDPROTBANAPA     | 1179                       | CAAACAC                          | S000143   |
| AACACOREOSGLUB1      | 507                        | AACAAAC                          | S000353   |
| ABRELATERD1          | 588                        | ACGTG                            | S000414   |
| ABREOSRAB21          | 1250                       | ACGTSSSC                         | S000012   |
| ABRERATCAL           | 871                        | MACGYGB                          | S000507   |
| ACGTABOX             | 797                        | TACGTA                           | S000130   |
| ACGTATERD1           | 425                        | ACGT                             | S000415   |
| ACGTCBOX             | 424                        | GACGTC                           | S000131   |
| ACGTOSGLUB1          | 944                        | GTACGTG                          | S000278   |
| AMMORESIVDCRNIA1     | 439                        | CGAACTT                          | S000375   |
| ANAERO1CONSENSUS     | 365                        | AAACAAA                          | S000477   |
| ANAERO3CONSENSUS     | 431                        | TCATCAC                          | S000479   |
| ARR1AT               | 484                        | NGATT                            | S000454   |
| ASF1MOTIFCAMV        | 75                         | TGACG                            | S000024   |
| CAATBOX1             | 158                        | CAAT                             | S000028   |
| CACTFTPPCA1          | 270                        | YACT                             | S000449   |
| CANBNNAPA            | 961                        | CNAACAC                          | S000148   |
| CARGCW8GAT           | 1353                       | CWWWWWWWWG                       | S000431   |
| CARGNCAT             | 1352                       | CCWWWWWWWWGG                     | S000446   |
| CATATGGMSAUR         | 559                        | CATATG                           | S000370   |
| CBFHV                | 584                        | RYCGAC                           | S000497   |
| CCA1ATLHCB1          | 915                        | AAMAATCT                         | S000149   |
| CCAATBOX1            | 167                        | CCAAT                            | S000030   |
| CGACGOSAMY3          | 423                        | CGACG                            | S000205   |
| CGCGBOXAT            | 872                        | VCGCGB                           | S000501   |
| CURECORECR           | 162                        | GTAC                             | S000493   |
| DOFCOREZM            | 82                         | AAAG                             | S000265   |
| DPBFCOREDCCDC3       | 870                        | ACACNNG                          | S000292   |
| DRECRTCOREAT         | 584                        | RCCGAC                           | S000418   |
| E2FCONSENSUS         | 975                        | WTTSSCSS                         | S000476   |
| EBOXBNNAPA           | 452                        | CANNTG                           | S000144   |
| EECCRAH1             | 1210                       | GANTTNC                          | S000494   |
| GATABOX              | 25                         | GATA                             | S000039   |
| GCCCORE              | 1240                       | GCCGCC                           | S000430   |
| GT1CONSENSUS         | 759                        | GRWAAW                           | S000198   |
| GTGANTG10            | 455                        | GTGA                             | S000378   |
| HEXMOTIFTAH3H4       | 425                        | ACGTCA                           | S000053   |
| LECPLEACS2           | 888                        | TAAAATAT                         | S000465   |

|                    |      |                              |         |
|--------------------|------|------------------------------|---------|
| LTRECOREATCOR15    | 422  | CCGAC                        | S000153 |
| MARTBOX            | 56   | TTWTWTTWTT                   | S000067 |
| MYB1AT             | 649  | WAACCA                       | S000408 |
| MYB1LEPR           | 149  | GTTAGTT                      | S000443 |
| MYB2AT             | 275  | TAACTG                       | S000177 |
| MYB2CONSENSUSAT    | 275  | YAACKG                       | S000409 |
| MYBCORE            | 8    | CNGTTR                       | S000176 |
| MYBPLANT           | 1176 | MACCWAMC                     | S000167 |
| MYBPZM             | 464  | CCWACC                       | S000179 |
| MYBST1             | 596  | GGATA                        | S000180 |
| MYCCONSENSUSAT     | 452  | CANNTG                       | S000407 |
| NAPINMOTIFBN       | 183  | TACACAT                      | S000070 |
| P1BS               | 558  | GNATATNC                     | S000459 |
| PE2FNTRNR1A        | 975  | ATTCGCGC                     | S000455 |
| POLLEN1LELAT52     | 362  | AGAAA                        | S000245 |
| PRECONSCRHSP70A    | 1514 | SCGAYNRNNNNNNNNNNNNNNNNNNHHD | S000506 |
| PROXBBNNAPA        | 1179 | CAAACACC                     | S000263 |
| RAV1AAT            | 506  | CAACA                        | S000314 |
| RAV1BAT            | 1369 | CACCTG                       | S000315 |
| REBETALGLHCB21     | 595  | CGGATA                       | S000363 |
| RHERPATEXPA7       | 823  | KCACGW                       | S000512 |
| ROOTMOTIFTAPOX1    | 265  | ATATT                        | S000098 |
| RYREPEATBNNAPA     | 719  | CATGCA                       | S000264 |
| RYREPEATGMGY2      | 719  | CATGCAT                      | S000105 |
| RYREPEATLEGUMINBOX | 719  | CATGCAY                      | S000100 |
| SEF4MOTIFGM7S      | 44   | RTTTTTR                      | S000103 |
| SITEIIATCYTC       | 412  | TGGGCY                       | S000474 |
| SORLIP1AT          | 573  | GCCAC                        | S000482 |
| SORLIP2AT          | 413  | GGGCC                        | S000483 |
| SORLIP5AT          | 750  | GAGTGAG                      | S000486 |
| SURECOREATSULTR11  | 91   | GAGAC                        | S000499 |
| SV40COREENHAN      | 146  | GTGGWWHG                     | S000123 |
| TAAAGSTKST1        | 521  | TAAAG                        | S000387 |
| TATABOX3           | 114  | TATTAAT                      | S000110 |
| TATABOX5           | 48   | TTATTT                       | S000203 |
| WBOXATNPR1         | 74   | TTGAC                        | S000390 |
| WBOXNTERF3         | 237  | TGACY                        | S000457 |
| WRKY71OS           | 75   | TGAC                         | S000447 |
| WUSATAg            | 116  | TTAATGG                      | S000433 |

---

**Table S5** Various cis-elements, sequences, nucleotide position and ID of OsMATE2

| <b>Cis- elements</b> | <b>Nucleotide position</b> | <b>Sequence of cis- elements</b> | <b>ID</b> |
|----------------------|----------------------------|----------------------------------|-----------|
| -10PEHVPSBD          | 693                        | TATTCT                           | S000392   |
| -300ELEMENT          | 663                        | TGHAAARK                         | S000122   |
| ABRELATERD1          | 38                         | ACGTG                            | S000414   |
| ABRERATCAL           | 37                         | MACGYGB                          | S000507   |
| ACGTATERD1           | 38                         | ACGT                             | S000415   |
| AMMORESIIUDCRNIA1    | 212                        | GGWAGGGT                         | S000374   |
| ANAERO1CONSENSUS     | 651                        | AAACAAA                          | S000477   |
| ARR1AT               | 421                        | NGATT                            | S000454   |
| BIHD1OS              | 75                         | TGTCA                            | S000498   |
| BOXLCOREDCPAL        | 1219                       | ACCWWCC                          | S000492   |
| CAATBOX1             | 170                        | CAAT                             | S000028   |
| CACTFTPPCA1          | 1140                       | YACT                             | S000449   |
| CATATGGMSAUR         | 374                        | CATATG                           | S000370   |
| CCAATBOX1            | 432                        | CCAAT                            | S000030   |
| CEREGLUBOX2PSLEGA    | 252                        | TGAAAACCT                        | S000033   |
| CGACGOSAMY3          | 1377                       | CGACG                            | S000205   |
| CGCGBOXAT            | 1388                       | VCGCGB                           | S000501   |
| CPBCSPOR             | 736                        | TATTAG                           | S000491   |
| CURECORECR           | 44                         | GTAC                             | S000493   |
| DOFCOREZM            | 247                        | AAAG                             | S000265   |
| EBOXBNNAPA           | 78                         | CANNTG                           | S000144   |
| ECCRCAH1             | 463                        | GANTTNC                          | S000494   |
| ERELEE4              | 1064                       | AWTTCAAA                         | S000037   |
| GAGA8HVBKN3          | 1339                       | GAGAGAGAGAGAGAGA                 | S000427   |
| GAGAGMGS1            | 1339                       | GAGAGAGAGAGAGAGAGA               | S000405   |
| GATABOX              | 331                        | GATA                             | S000039   |
| GCCCORE              | 1402                       | GCCGCC                           | S000430   |
| GT1CONSENSUS         | 197                        | GRWAAW                           | S000198   |
| GT1GMSCAM4           | 581                        | GAAAAA                           | S000453   |
| GTGANTG10            | 251                        | GTGA                             | S000378   |
| HEXAMERATH4          | 288                        | CCGTCG                           | S000146   |
| INRNTPSADB           | 487                        | YTCANTYY                         | S000395   |
| LECPLEACS2           | 1079                       | TAAAATAT                         | S000465   |
| MARARS               | 784                        | WTTTATRTTTW                      | S000064   |
| MYBCORE              | 29                         | CNGTTR                           | S000176   |
| MYBST1               | 346                        | GGATA                            | S000180   |
| MYCCONSUSAT          | 78                         | CANNTG                           | S000407   |
| NODCON1GM            | 328                        | AAAGAT                           | S000461   |



|                   |      |                              |         |
|-------------------|------|------------------------------|---------|
| NODCON2GM         | 603  | CTCTT                        | S000462 |
| OSE1ROOTNODULE    | 328  | AAAGAT                       | S000467 |
| OSE2ROOTNODULE    | 603  | CTCTT                        | S000468 |
| P1BS              | 546  | GNATATNC                     | S000459 |
| POLASIG1          | 404  | AATAAA                       | S000080 |
| POLASIG2          | 997  | AATTAAT                      | S000081 |
| POLASIG3          | 1035 | AATAAT                       | S000088 |
| POLLEN1LELAT52    | 580  | AGAAA                        | S000245 |
| PRECONSCRHSP70A   | 1376 | SCGAYNRNNNNNNNNNNNNNNNNNNHHD | S000506 |
| RAV1AAT           | 416  | CAACA                        | S000314 |
| ROOTMOTIFTAPOX1   | 617  | ATATT                        | S000098 |
| S1FBOXSORPS1L21   | 272  | ATGGTA                       | S000223 |
| SEF3MOTIFGM       | 901  | AACCCA                       | S000115 |
| SEF4MOTIFGM7S     | 501  | RTTTTTR                      | S000103 |
| SORLIP1AT         | 1193 | GCCAC                        | S000482 |
| SURECOREATSULTR11 | 111  | GAGAC                        | S000499 |
| T/GBOXATPIN2      | 37   | AACGTG                       | S000458 |
| TAAAGSTKST1       | 1006 | TAAAG                        | S000387 |
| TATABOX2          | 765  | TATAAAT                      | S000109 |
| TATABOX5          | 782  | TTATTT                       | S000203 |
| TATABOXOSPAL      | 929  | TATTTAA                      | S000400 |
| TATCCAOSAMY       | 646  | TATCCA                       | S000403 |
| TBOXATGAPB        | 257  | ACTTTG                       | S000383 |
| WBBOXPCWRKY1      | 832  | TTTGACY                      | S000310 |
| WBOXATNPR1        | 260  | TTGAC                        | S000390 |
| WBOXHVIS01        | 834  | TGACT                        | S000442 |
| WBOXNTERF3        | 701  | TGACY                        | S000457 |
| WRKY71OS          | 261  | TGAC                         | S000447 |

---

**Table S6** Quercetin (Q) and Kaempferol (K) content in leaves of WT and transgenic lines

|                   | <b>Q<sup>i</sup></b> | <b>K<sup>i</sup></b> |
|-------------------|----------------------|----------------------|
| <b>WT</b>         | 0.0214               | ND                   |
| <b>OsMATE1 L1</b> | 0.0256               | 0.006                |
| <b>L2</b>         | 0.019                | 0.0071               |
| <b>L3</b>         | 0.0174               | 0.006                |
| <b>OsMATE2 L1</b> | 0.0227               | 0.0072               |
| <b>L2</b>         | 0.0214               | 0.0071               |
| <b>L3</b>         | 0.0135               | 0.0066               |

---

<sup>i</sup> Values are average of 3 biological replicates and expressed as mg.g<sup>-1</sup> fresh weight of leaves.
